# Supplementary material for: Design, Synthesis, and Mechanistic Study of 2-Pyridone-Bearing Phenylalanine Derivatives as Novel HIV Capsid Modulators
Source: MDPI journal article supplement (doi:10.3390/molecules27217640), 2022-11-07

# **Design, Synthesis, and Mechanistic Study of 2-Pyridone-bearing Phenylalanine Derivatives as Novel HIV Capsid Modulators**

Xujie Zhang<sup>a,†</sup>, Lin Sun<sup>a,b,†</sup>, Shujing Xu<sup>a</sup>, Xiaoyu Shao<sup>a</sup>, Ziyi Li<sup>a</sup>, Dang Ding<sup>a</sup>, Xiangyi Jiang<sup>a</sup>, Shujie Zhao<sup>a</sup>, Simon Cocklin<sup>c</sup>, Erik De Clercq<sup>d</sup>, Christophe Pannecouque<sup>d,\*</sup>, Alexej Dick<sup>e,\*</sup>, Xinyong Liu<sup>a,\*</sup>, Peng Zhan<sup>a,\*</sup>

*<sup>a</sup>Department of Medicinal Chemistry, Key Laboratory of Chemical Biology (Ministry of Education), School of Pharmaceutical Sciences, Shandong University, 44 West Culture Road, 250012 Jinan, Shandong, China.*

*<sup>b</sup>Department of Pharmacy, Qilu Hospital of Shandong University, 107 West Culture Road, Jinan 250012, Shandong, China.*

*<sup>c</sup>Specifica, Inc., 1607 Alcala Street, Santa Fe, NM, 87501, USA*

*<sup>d</sup>Rega Institute for Medical Research, Laboratory of Virology and Chemotherapy, K.U. Leuven, Herestraat 49 Postbus 1043 (09.A097), B-3000, Leuven, Belgium*

*<sup>e</sup>Department of Biochemistry & Molecular Biology, Drexel University College of Medicine, Philadelphia, Pennsylvania, PA 19102, USA.*

\*Corresponding authors. E-mail address: zhanpeng1982@sdu.edu.cn (Zhan P.); xinyongl@sdu.edu.cn (Liu X.Y.); ad3474@drexel.edu (Dick A.); christophe.pannecouque@kuleuven.be (Pannecouque C.).

†These authors contributed equally to this work as first authors.

# 1 MS, $^1\text{H}$ -NMR and $^{13}\text{C}$ -NMR Spectra for Representative Target Compounds

## 1.1 MS, $^1\text{H}$ -NMR and $^{13}\text{C}$ -NMR Spectra for FTC-2

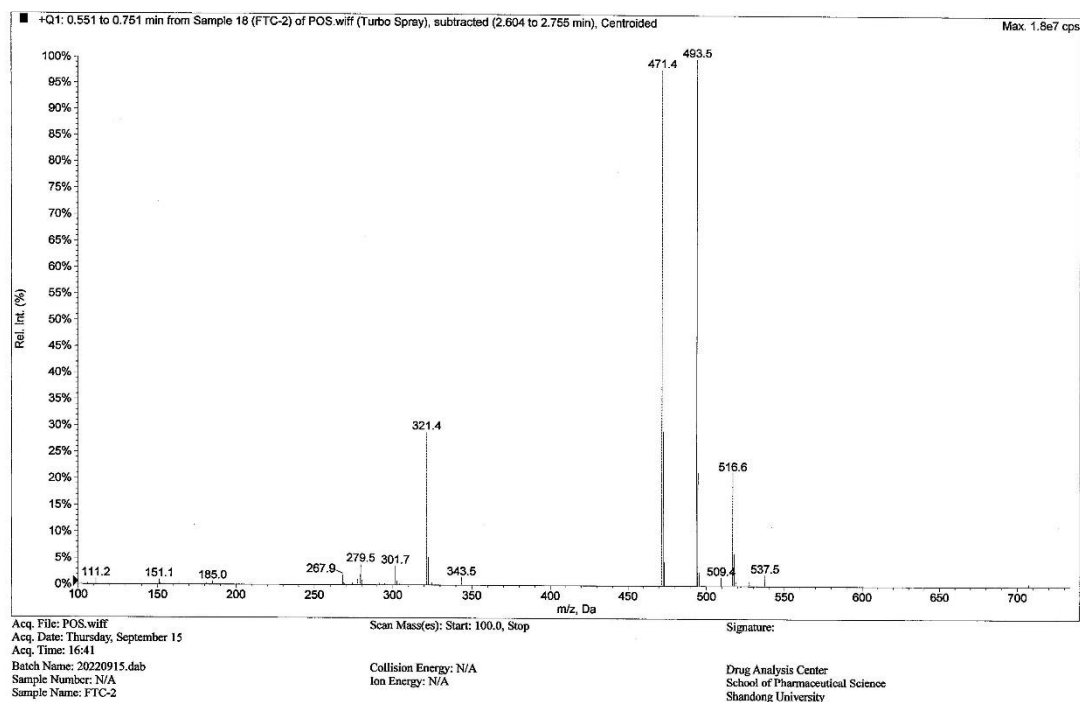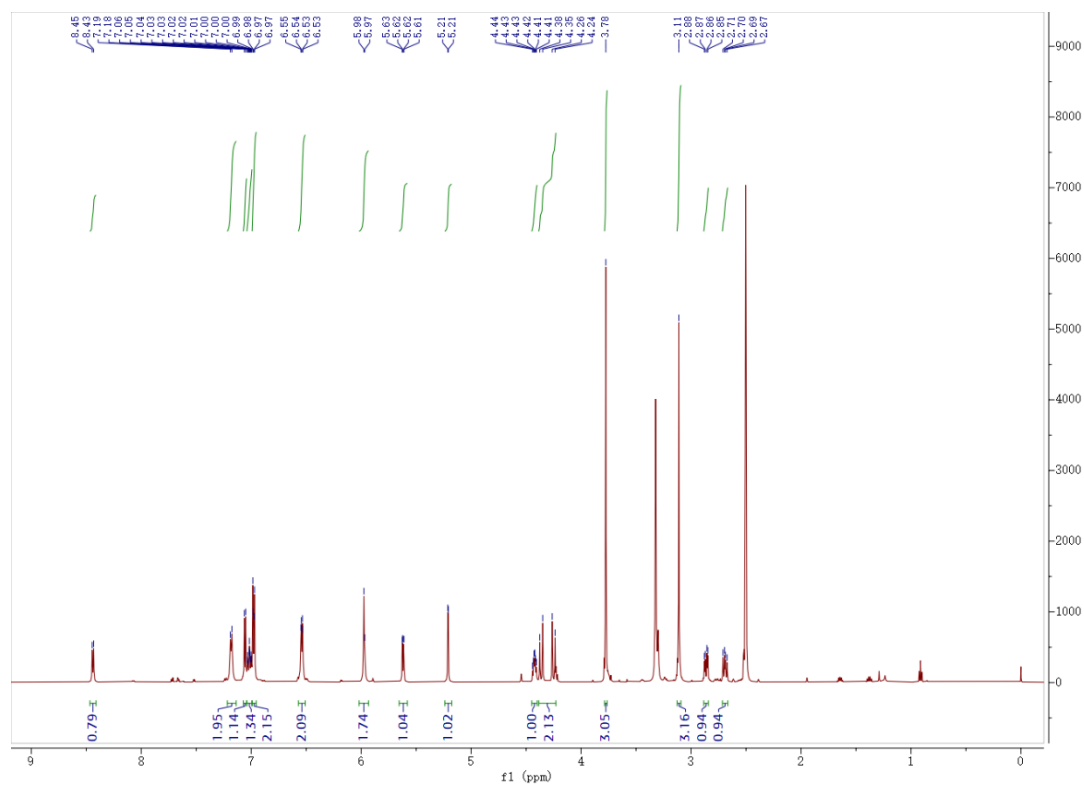

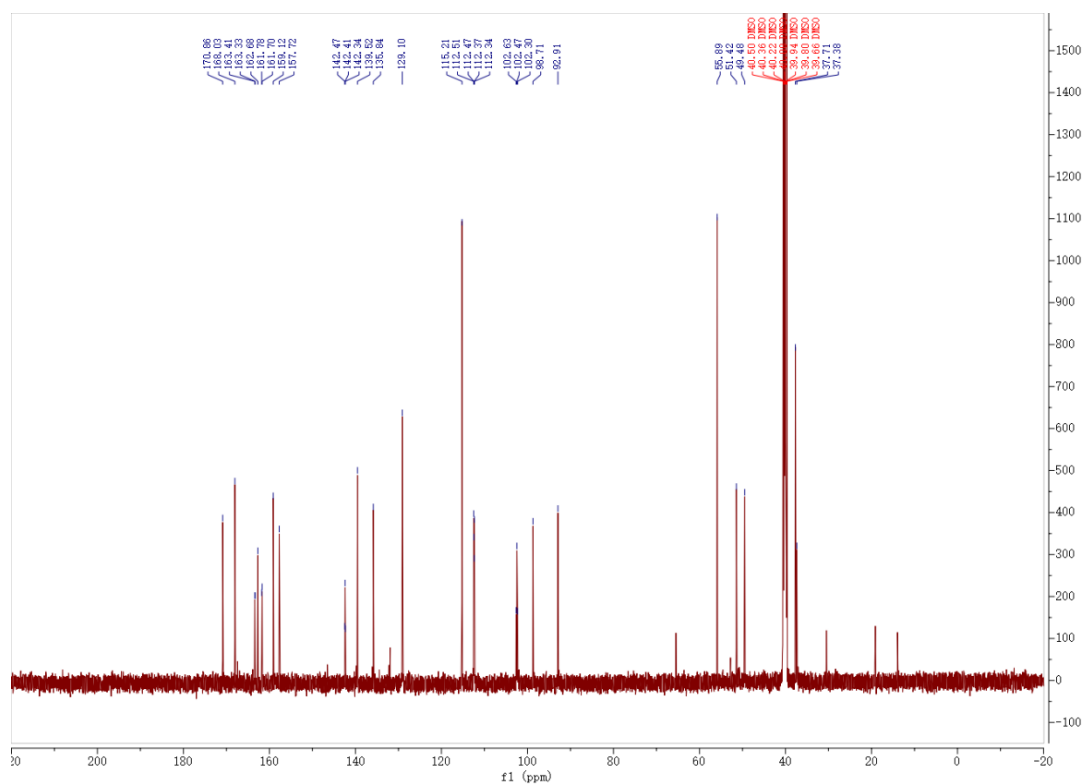

## 1.2 MS, $^1\text{H}$ -NMR and $^{13}\text{C}$ -NMR Spectra for TC-2

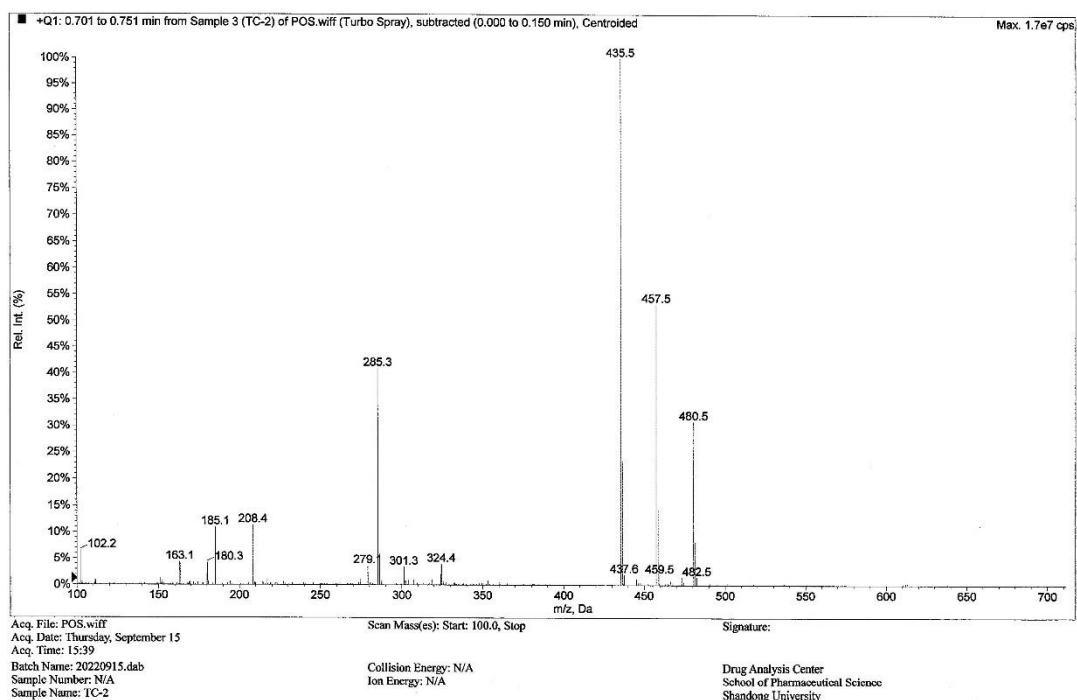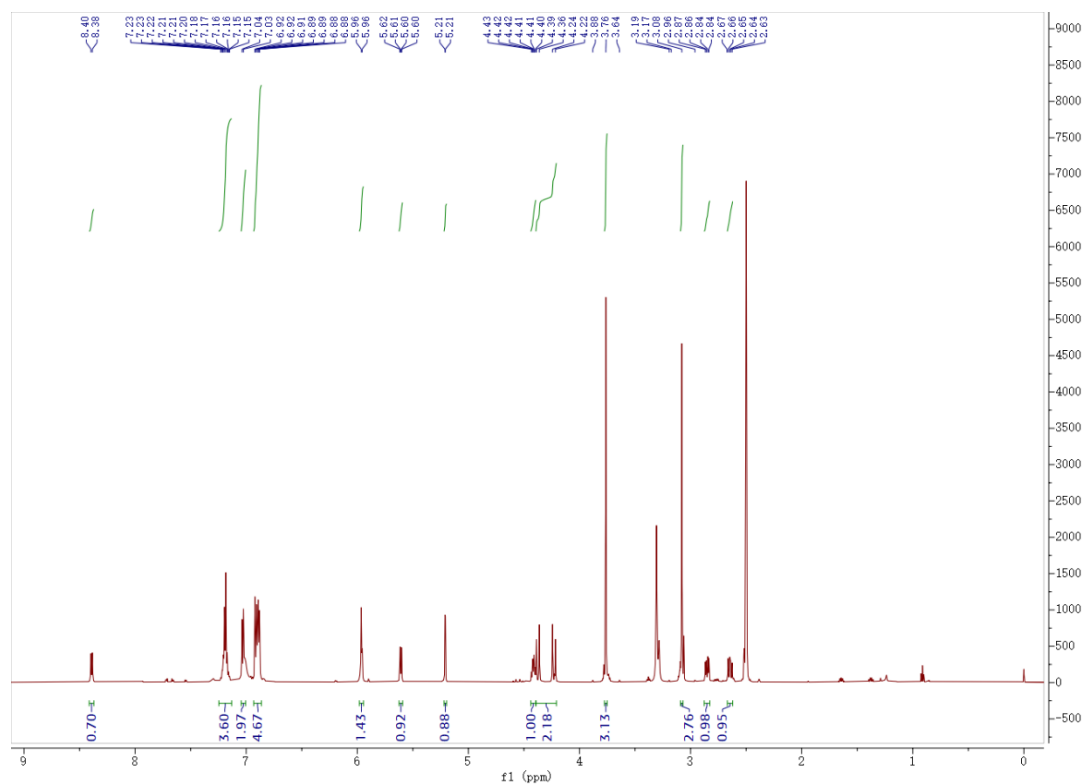

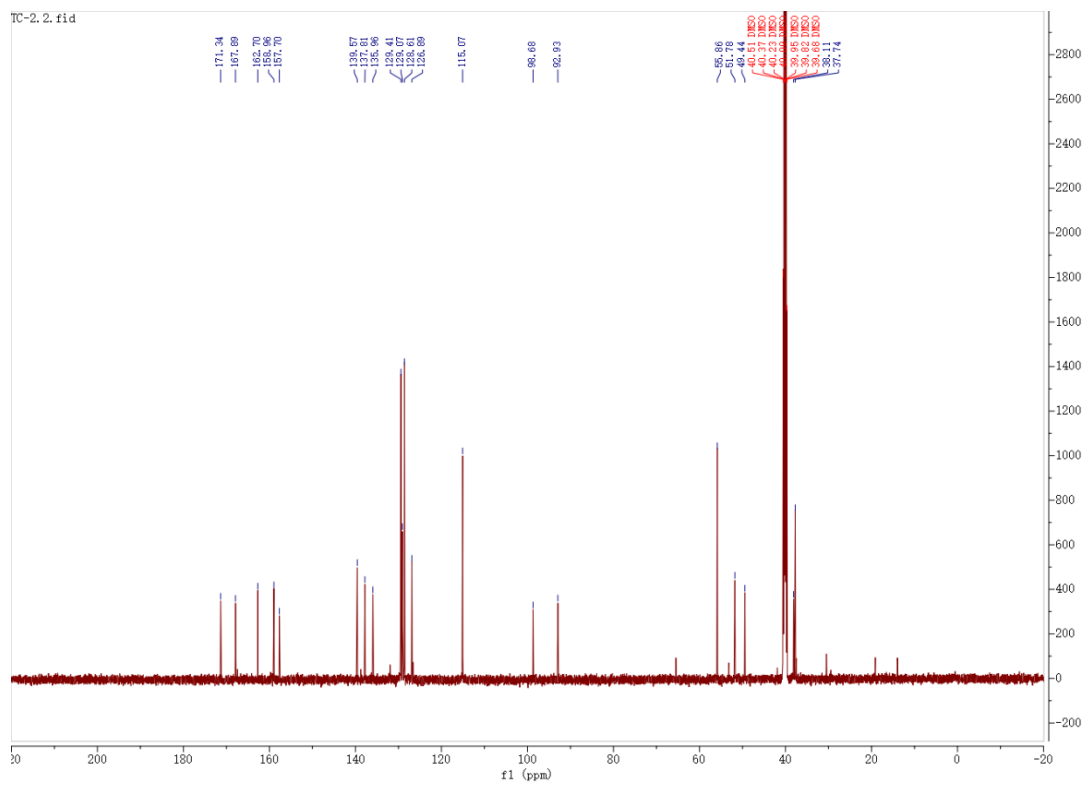

### 1.3 MS, $^1\text{H}$ -NMR and $^{13}\text{C}$ -NMR Spectra for TD-1a

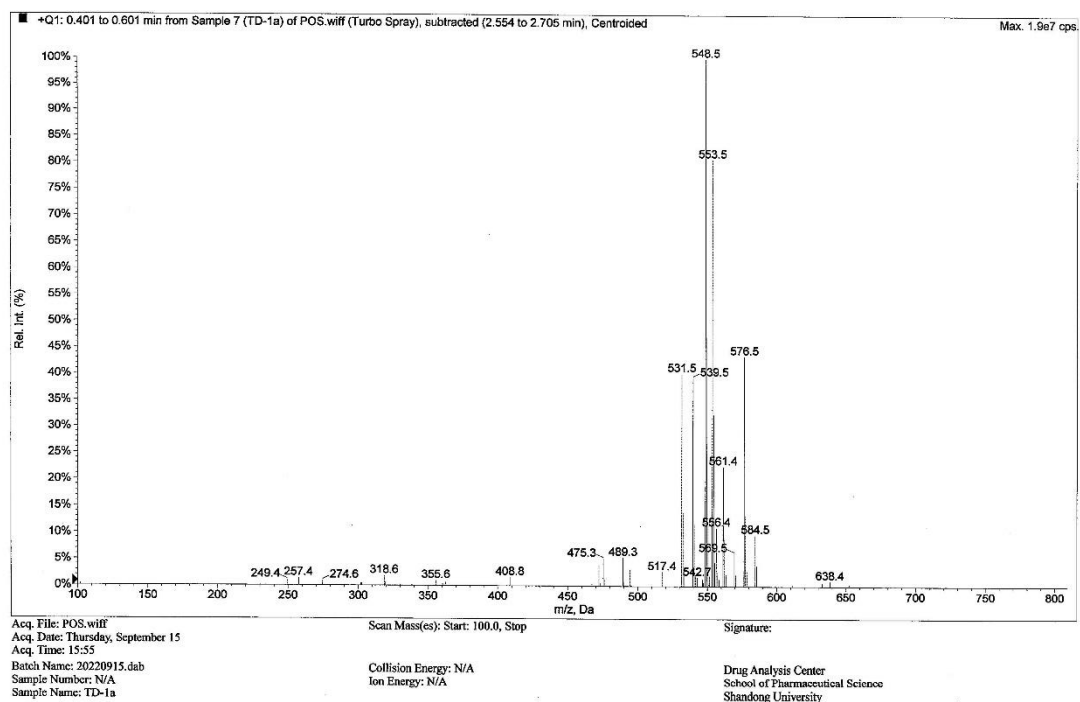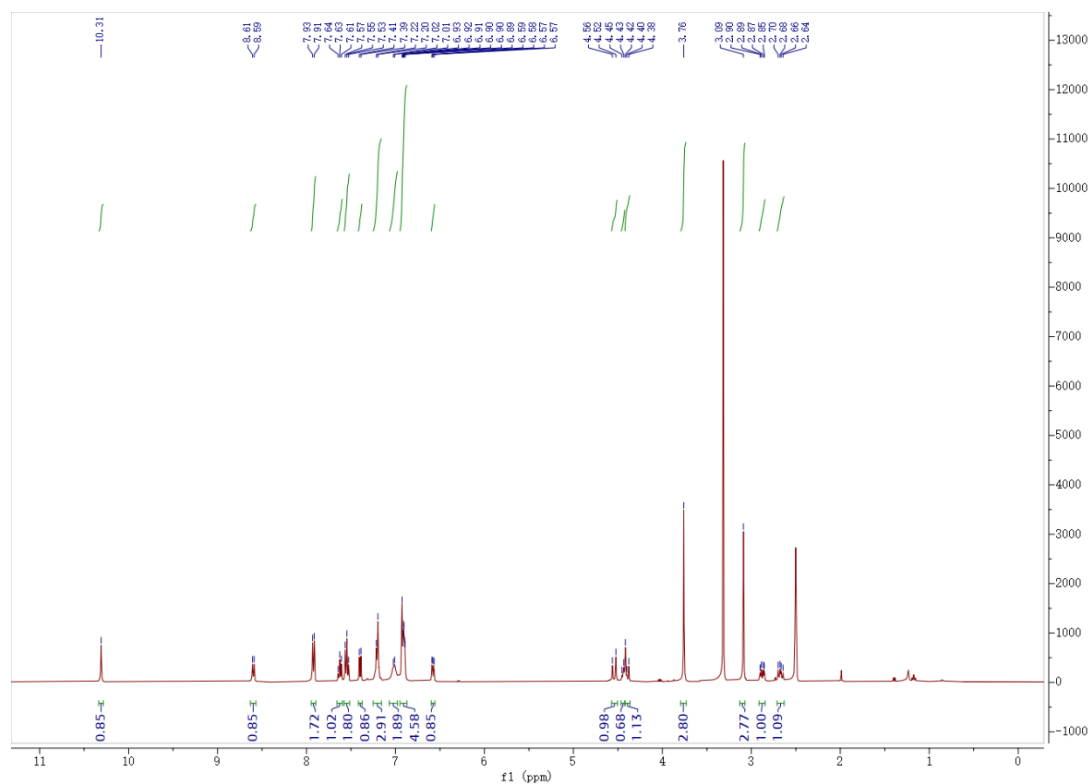

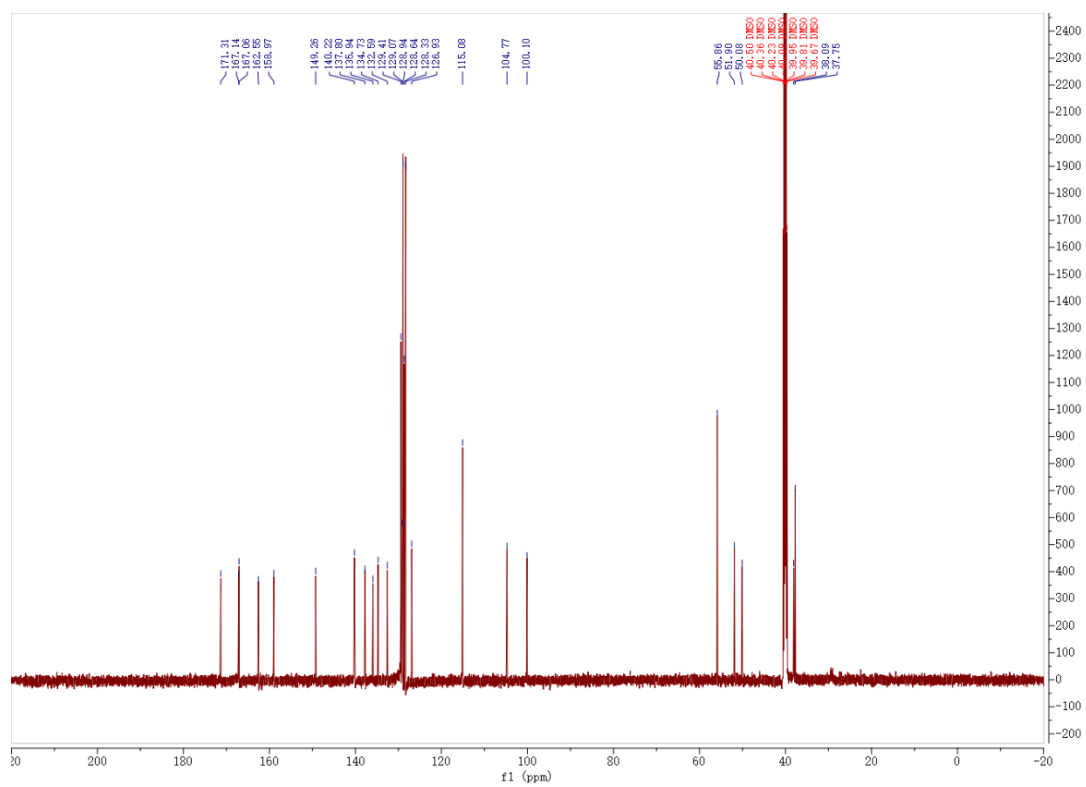

## 1.4 MS, $^1\text{H}$ -NMR and $^{13}\text{C}$ -NMR Spectra for TD-1b

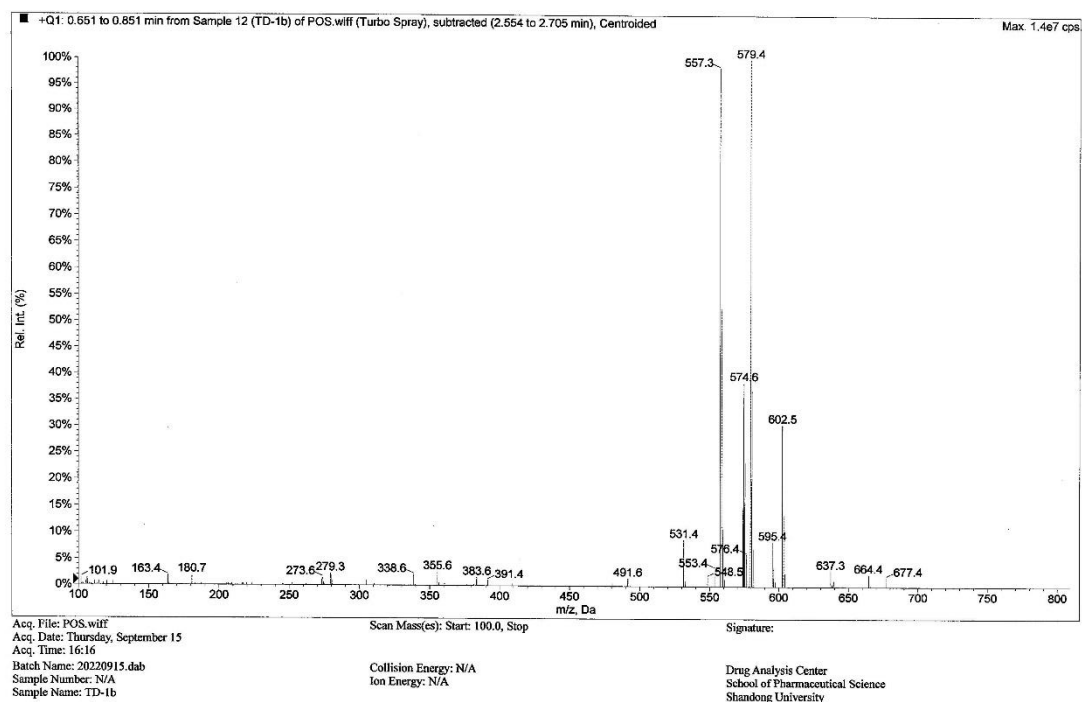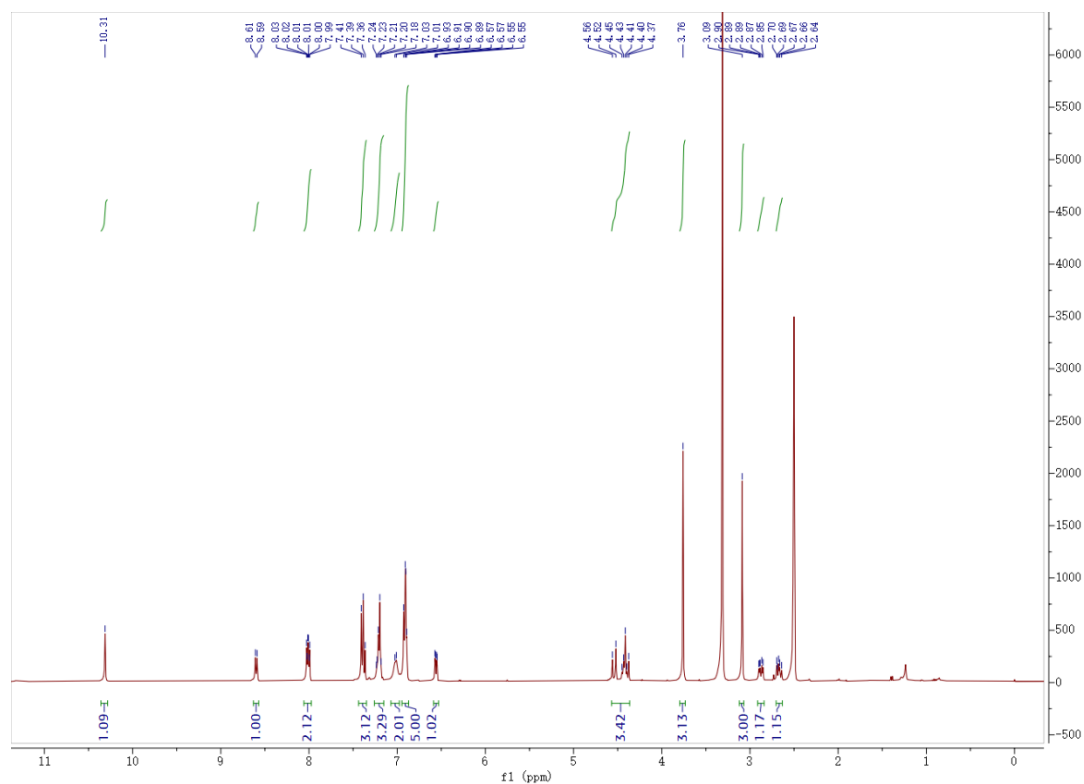



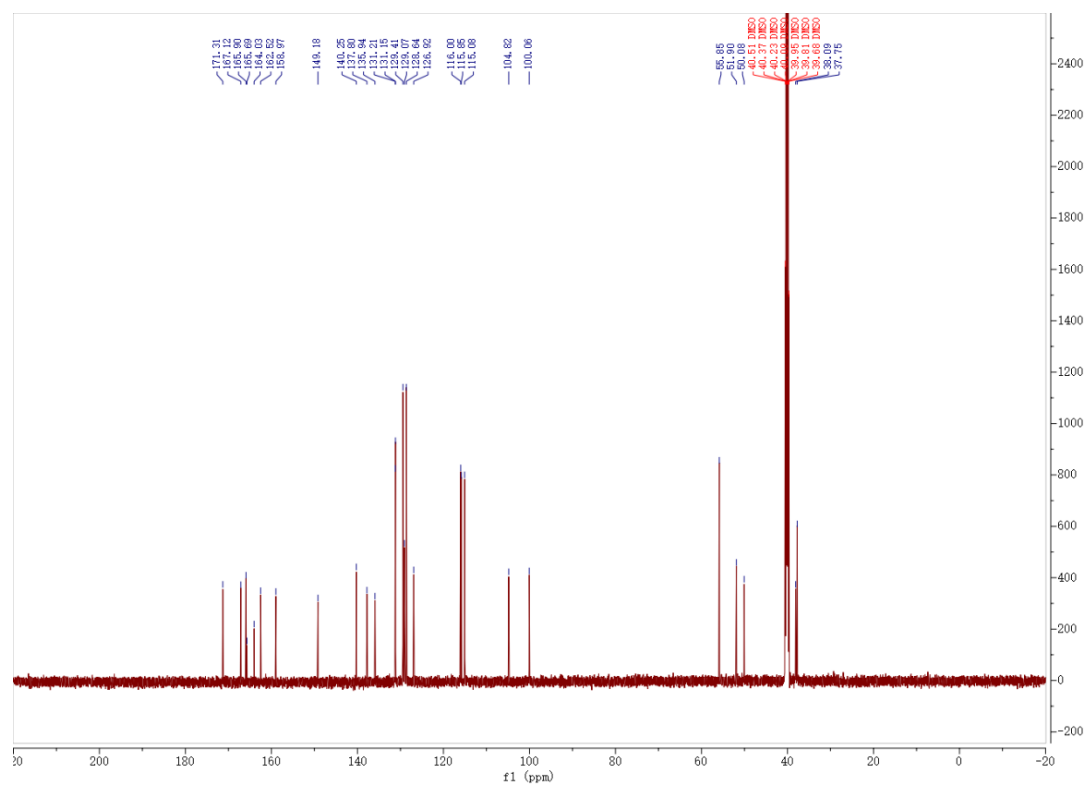

## 1.5 MS, $^1\text{H}$ -NMR and $^{13}\text{C}$ -NMR Spectra for TD-1c

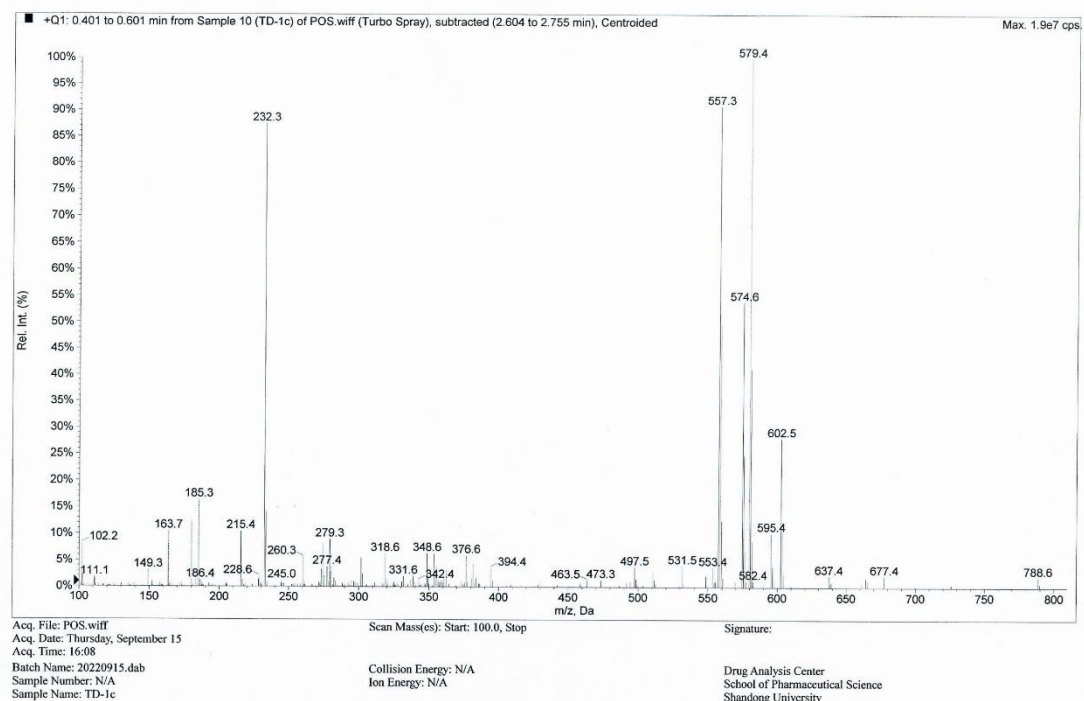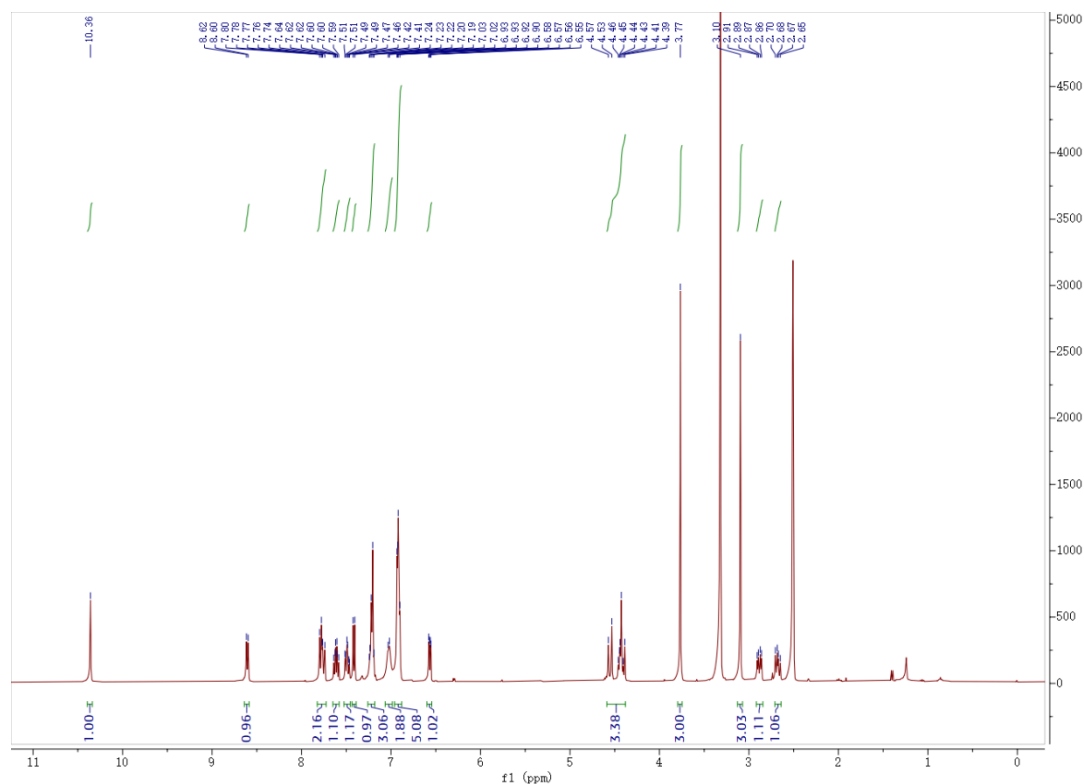

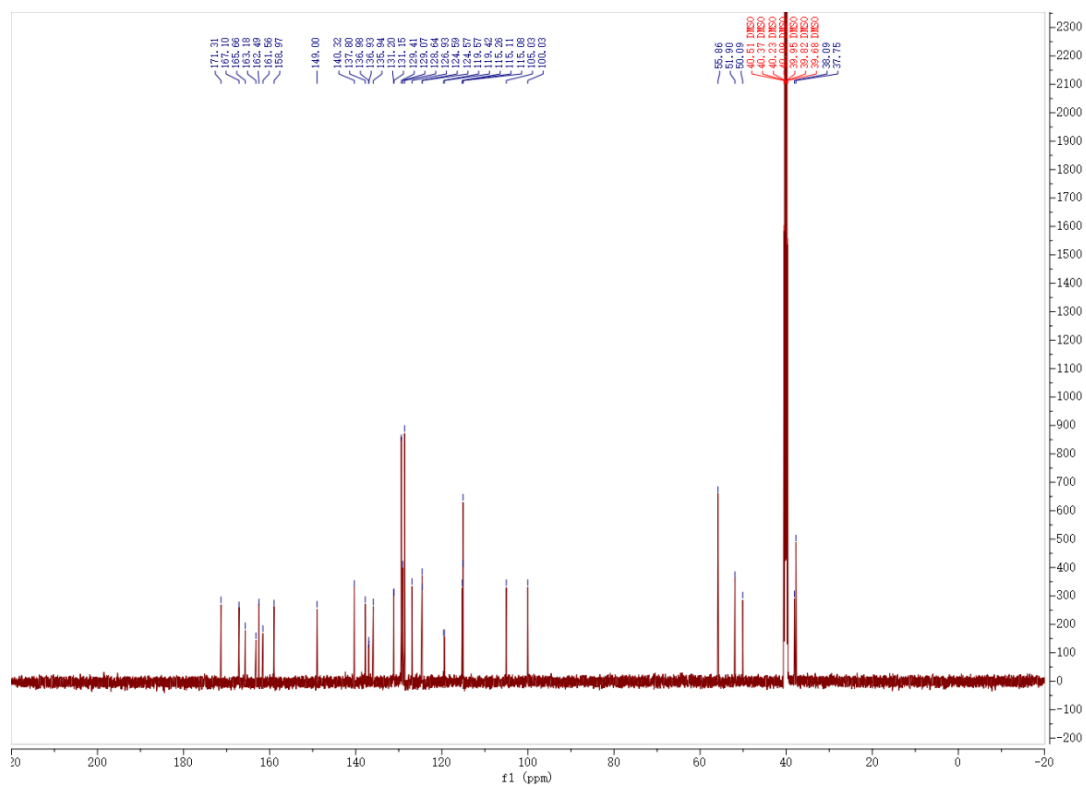

## 1.6 MS, $^1\text{H}$ -NMR and $^{13}\text{C}$ -NMR Spectra for TD-1d

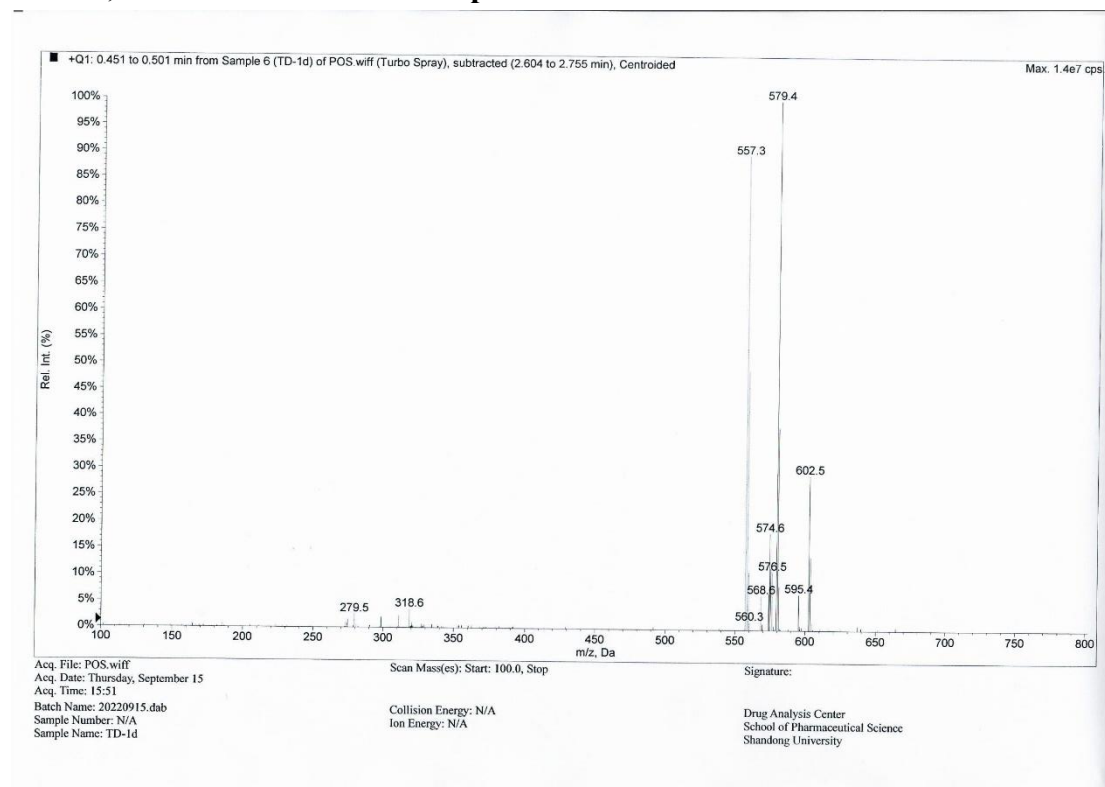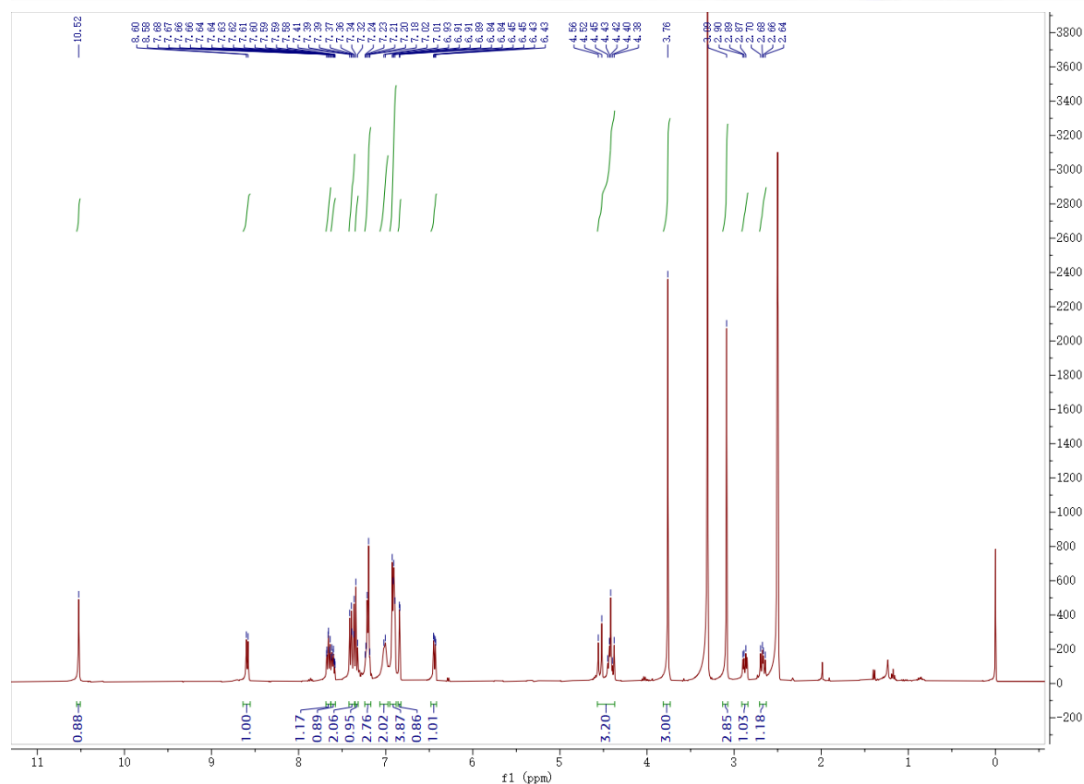

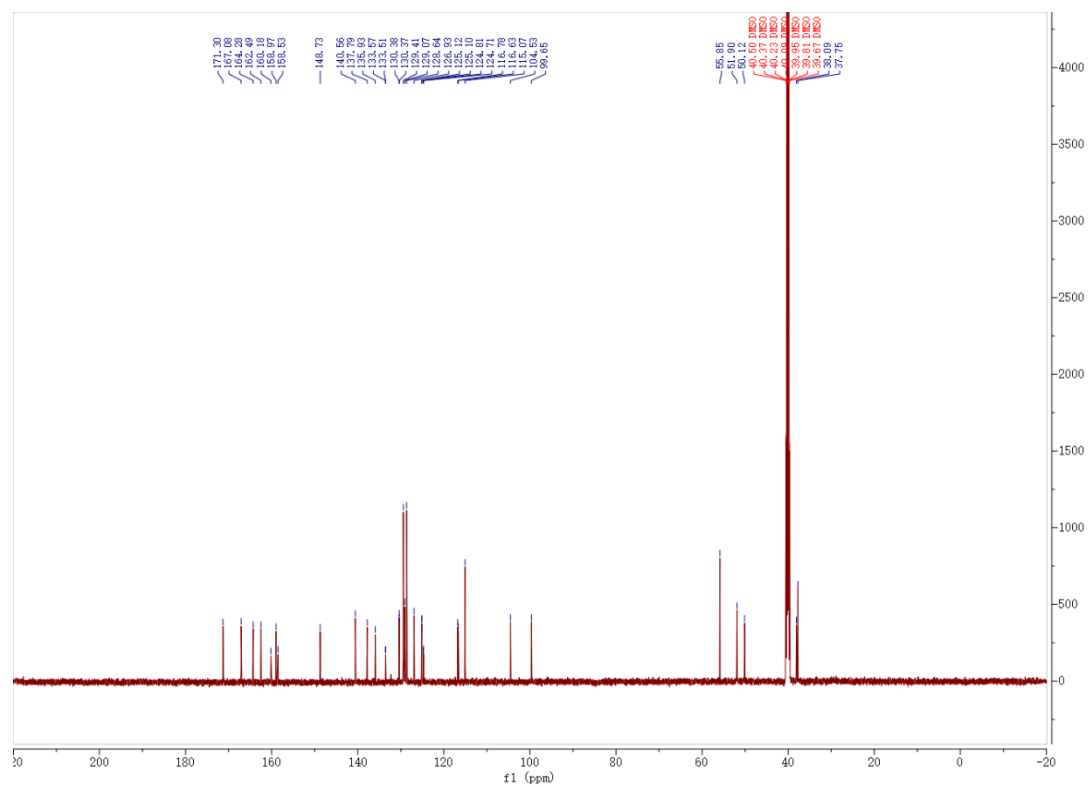

## 1.7 MS, $^1\text{H}$ -NMR and $^{13}\text{C}$ -NMR Spectra for TD-1e

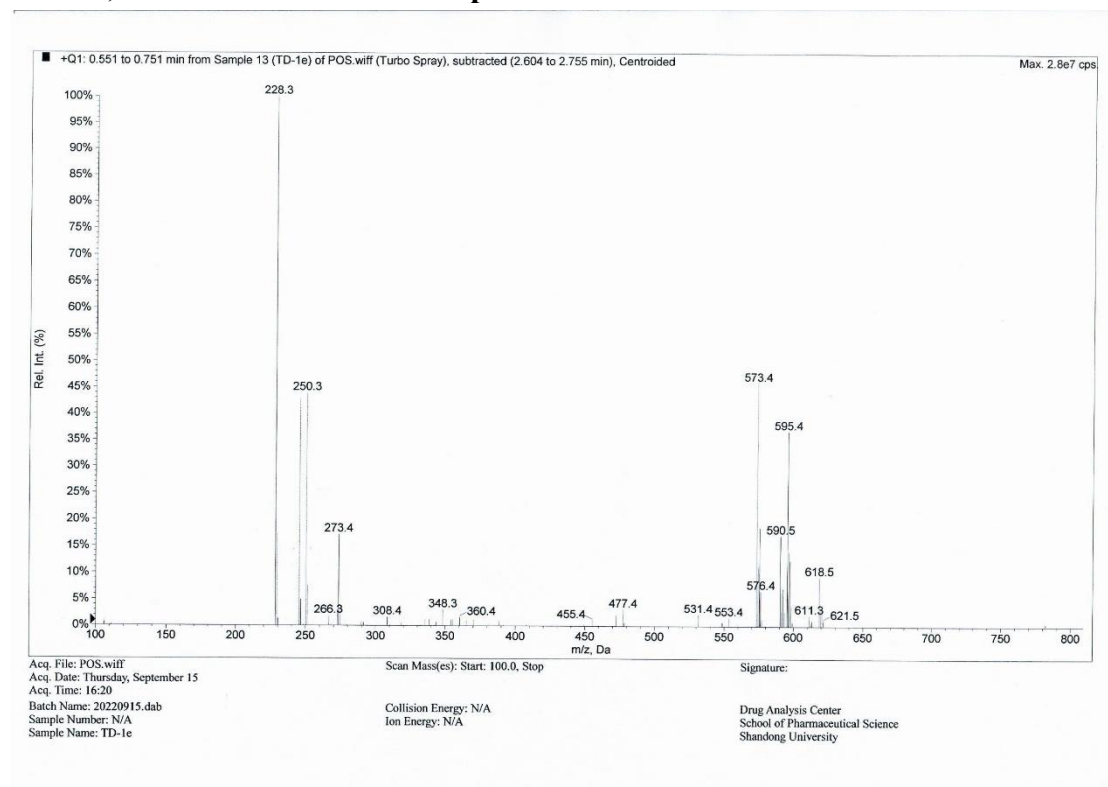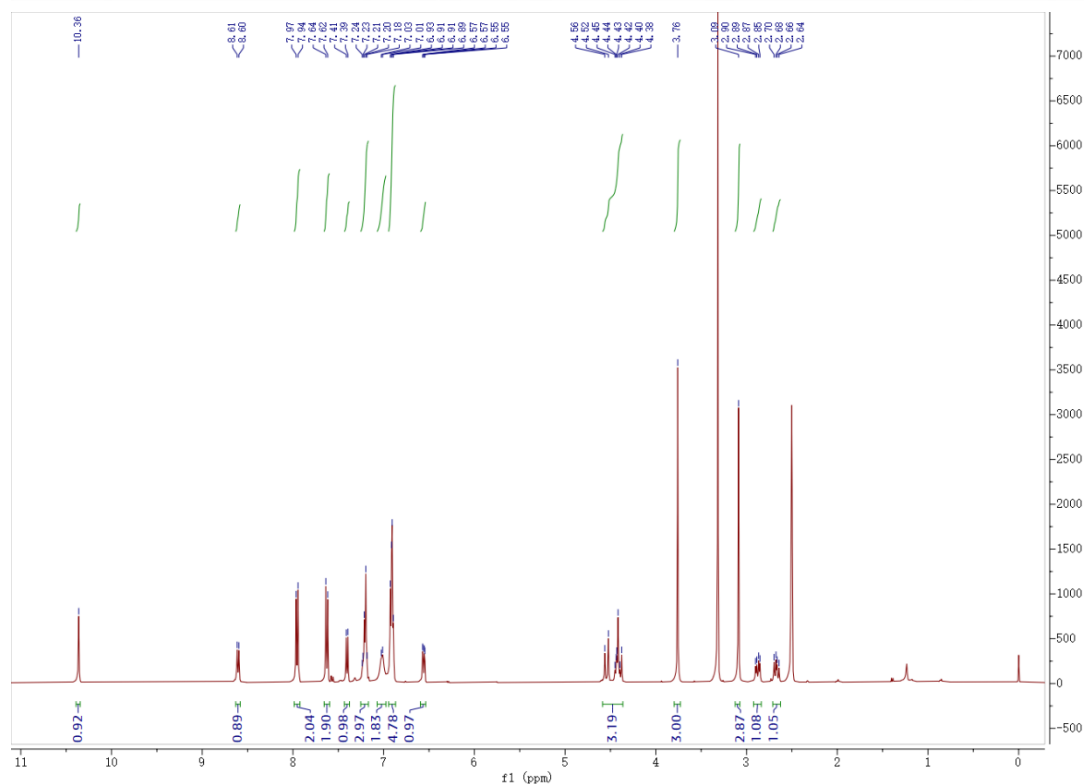

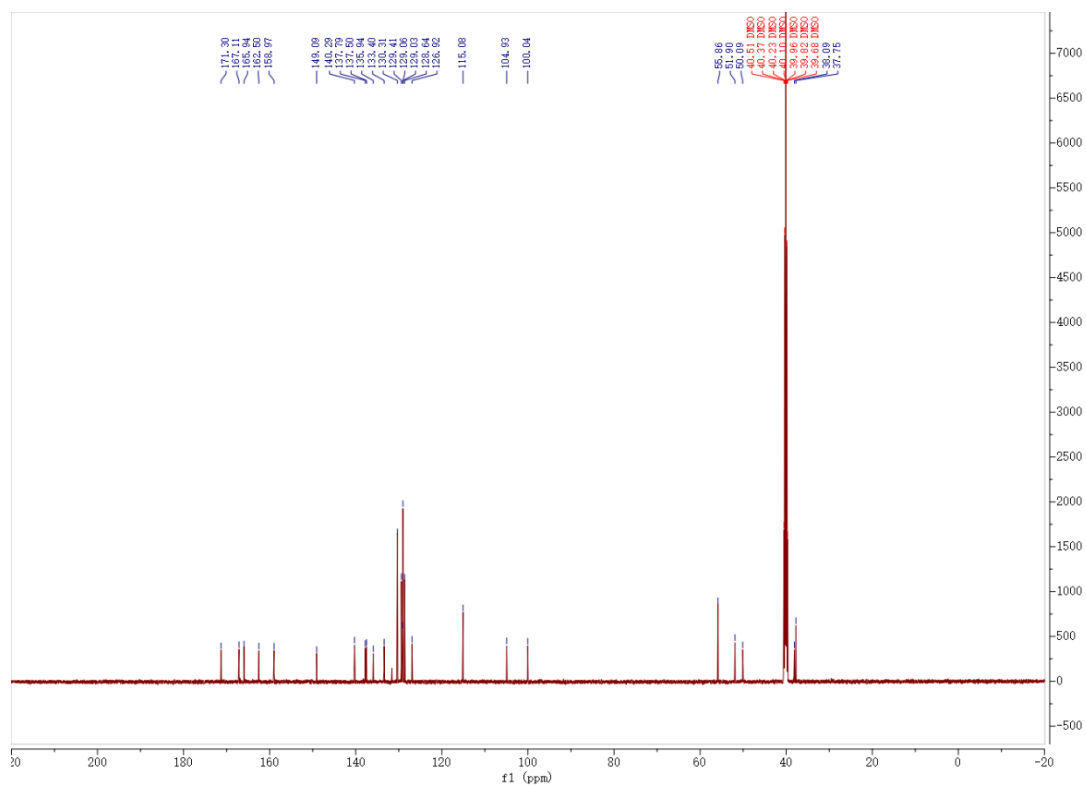

## 1.8 MS, $^1\text{H}$ -NMR and $^{13}\text{C}$ -NMR Spectra for TD-1f

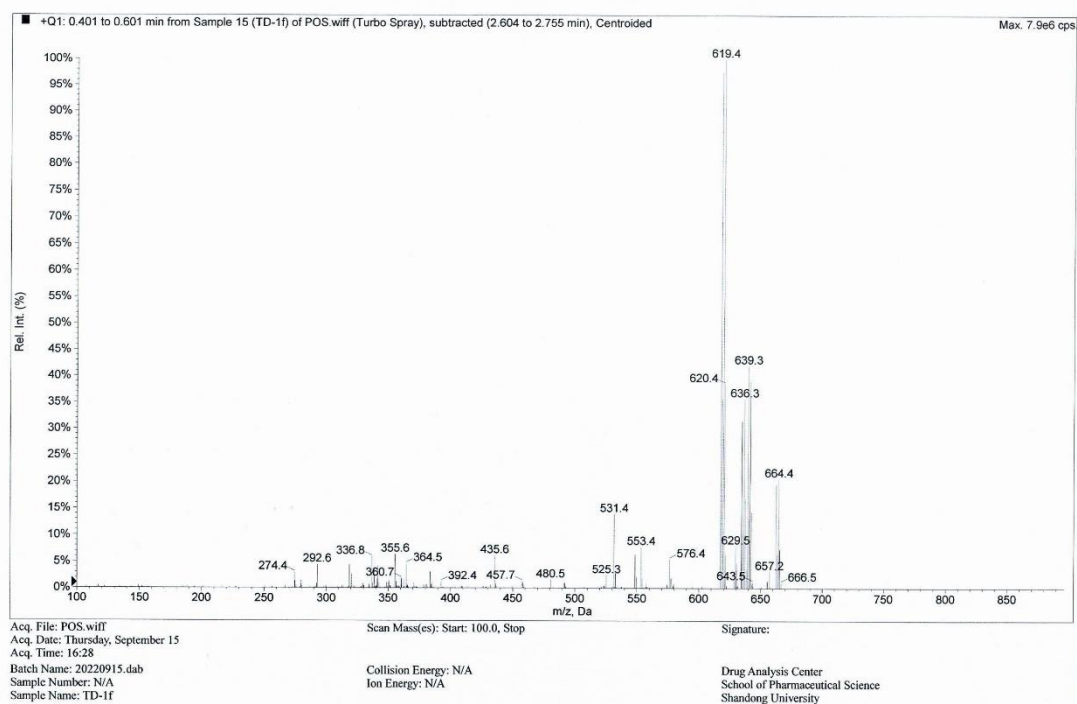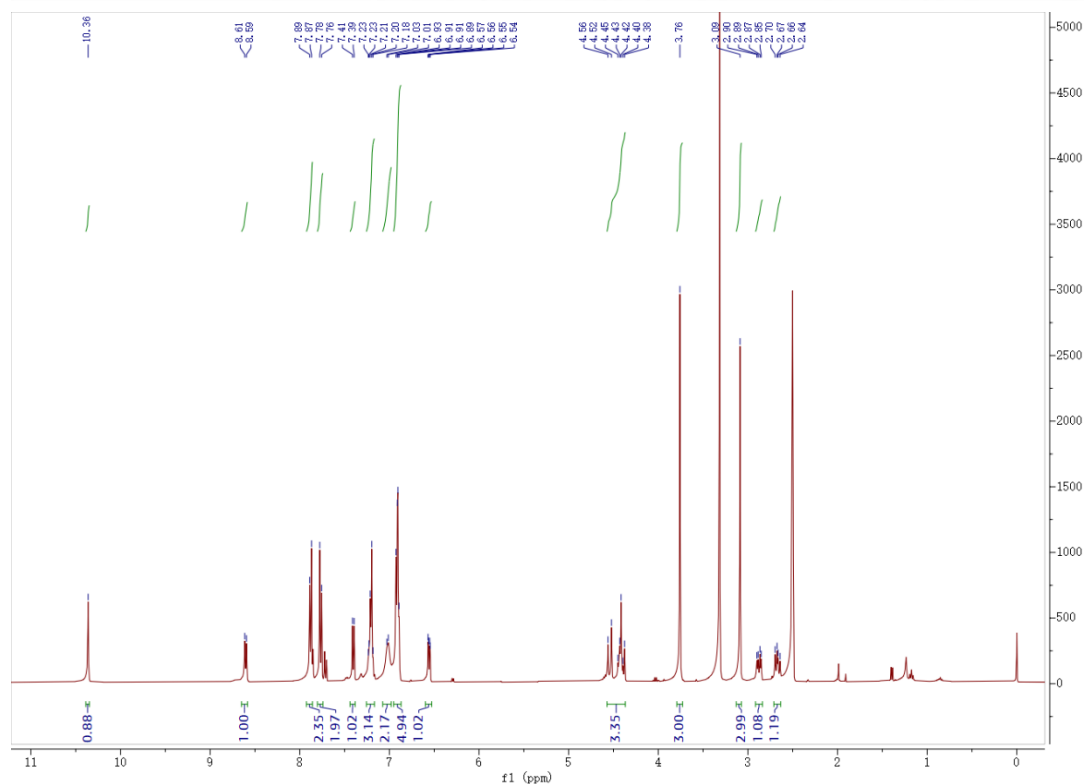



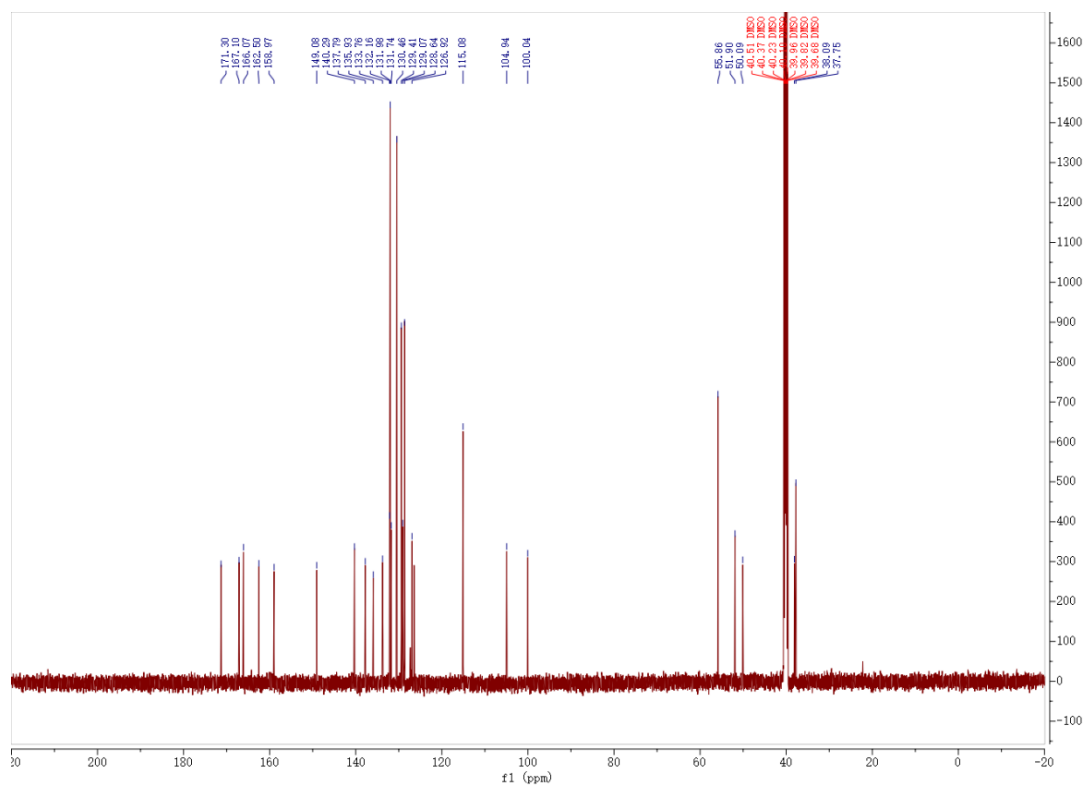

## 1.9 MS, $^1\text{H}$ -NMR and $^{13}\text{C}$ -NMR Spectra for TD-1g

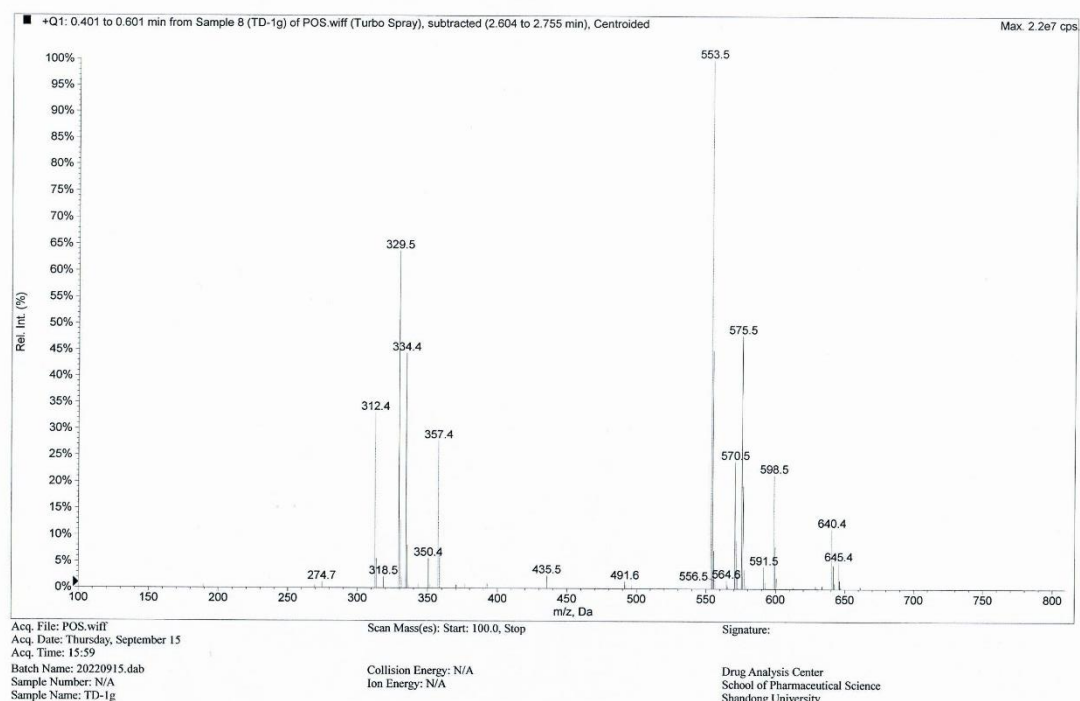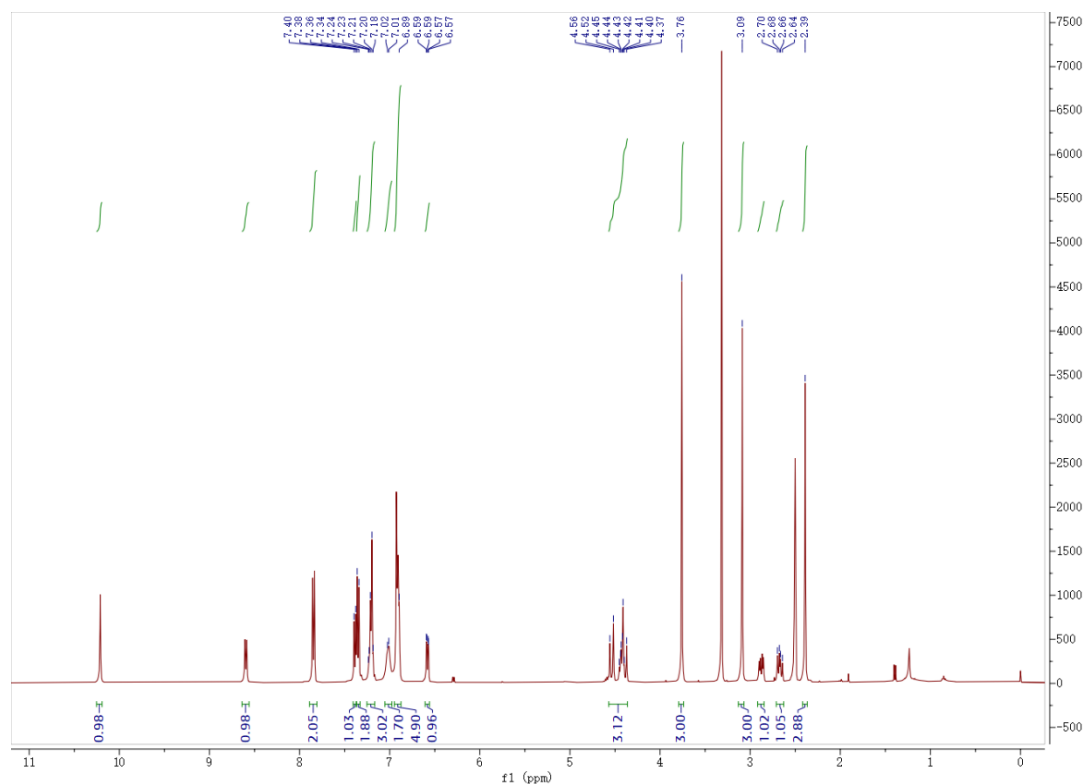

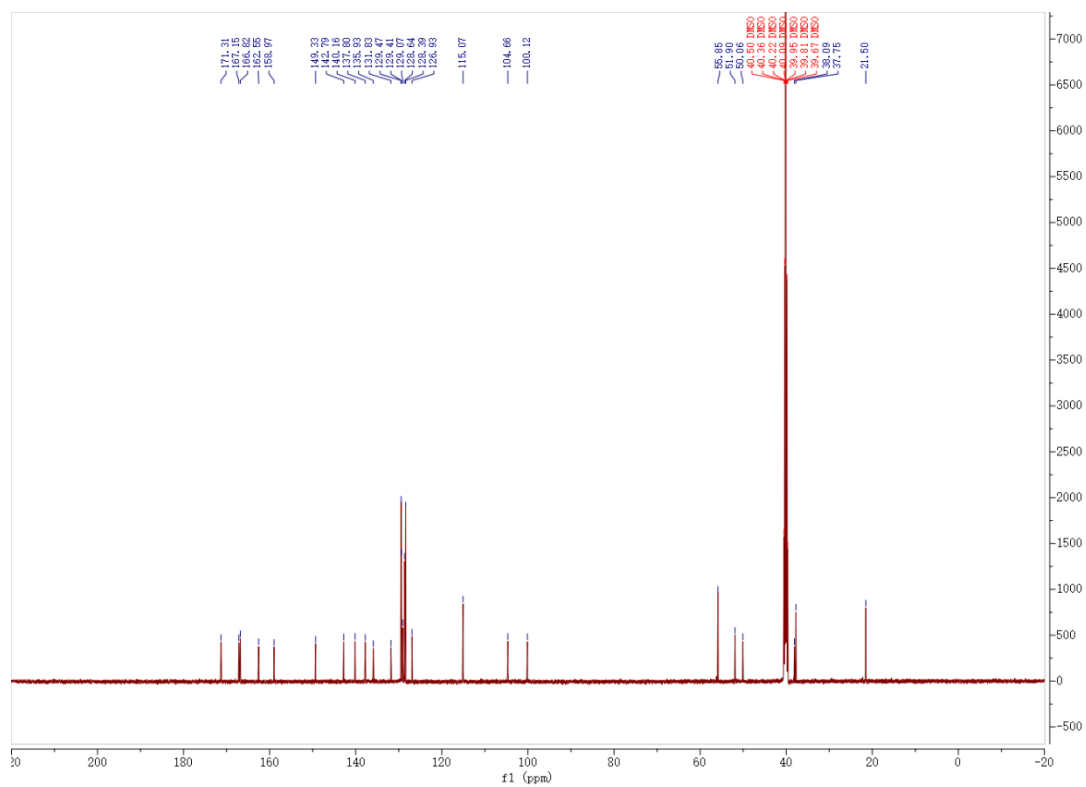

## 1.10 MS, $^1\text{H}$ -NMR and $^{13}\text{C}$ -NMR Spectra for TD-1h

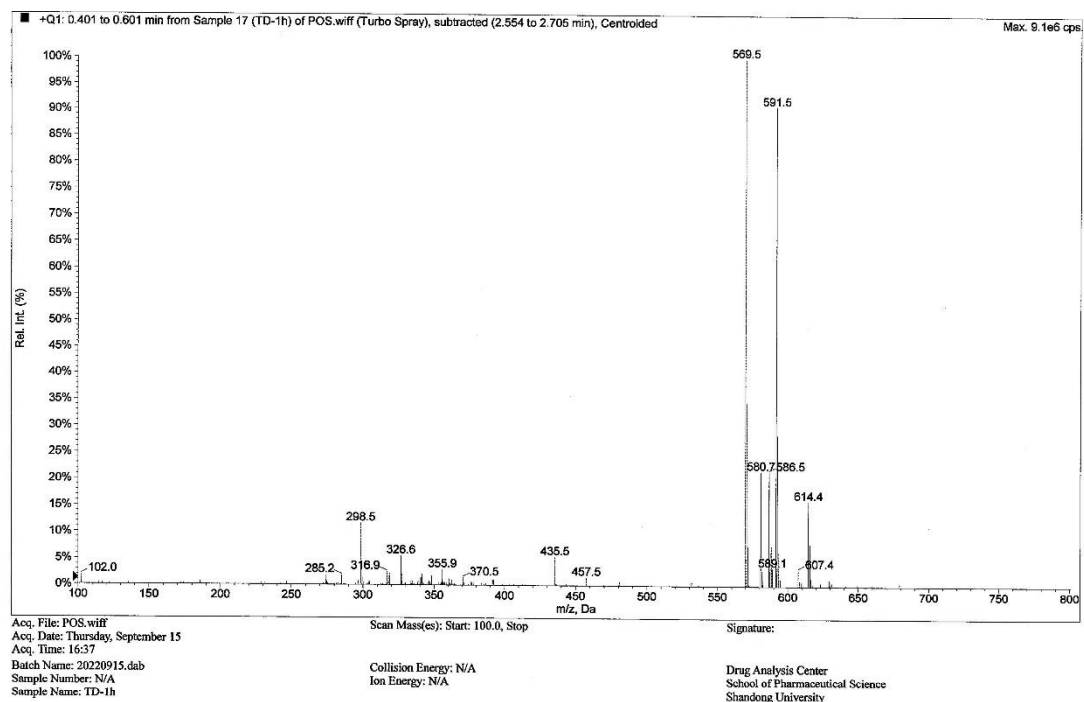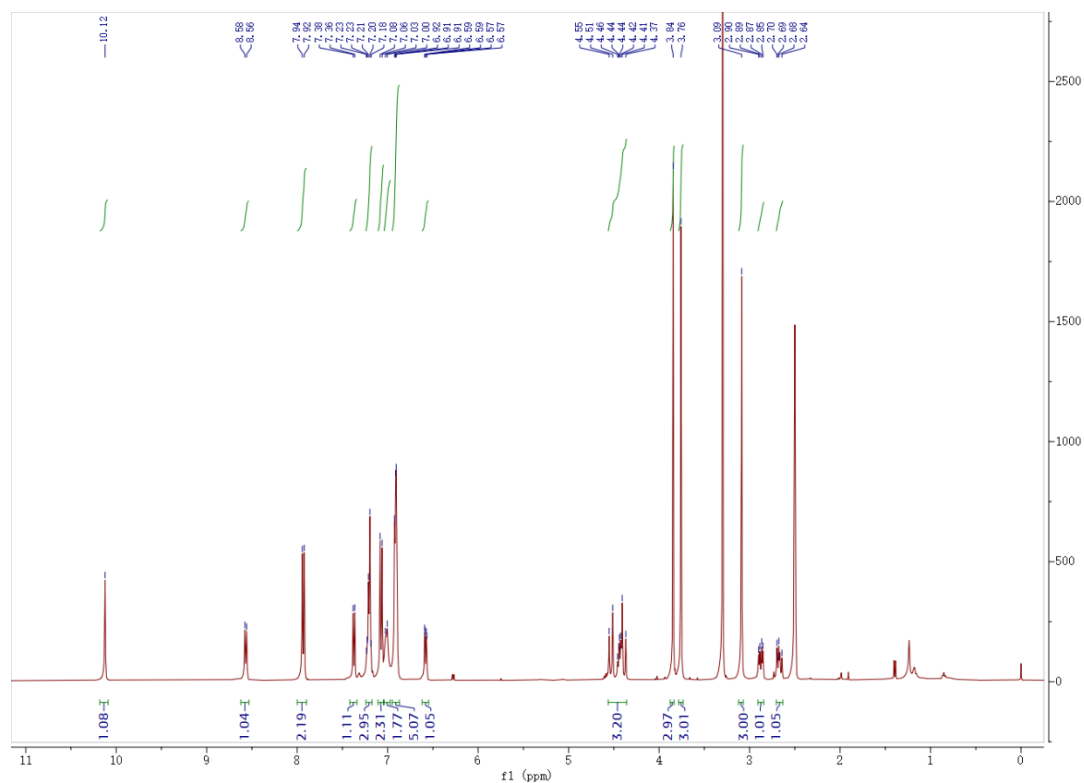

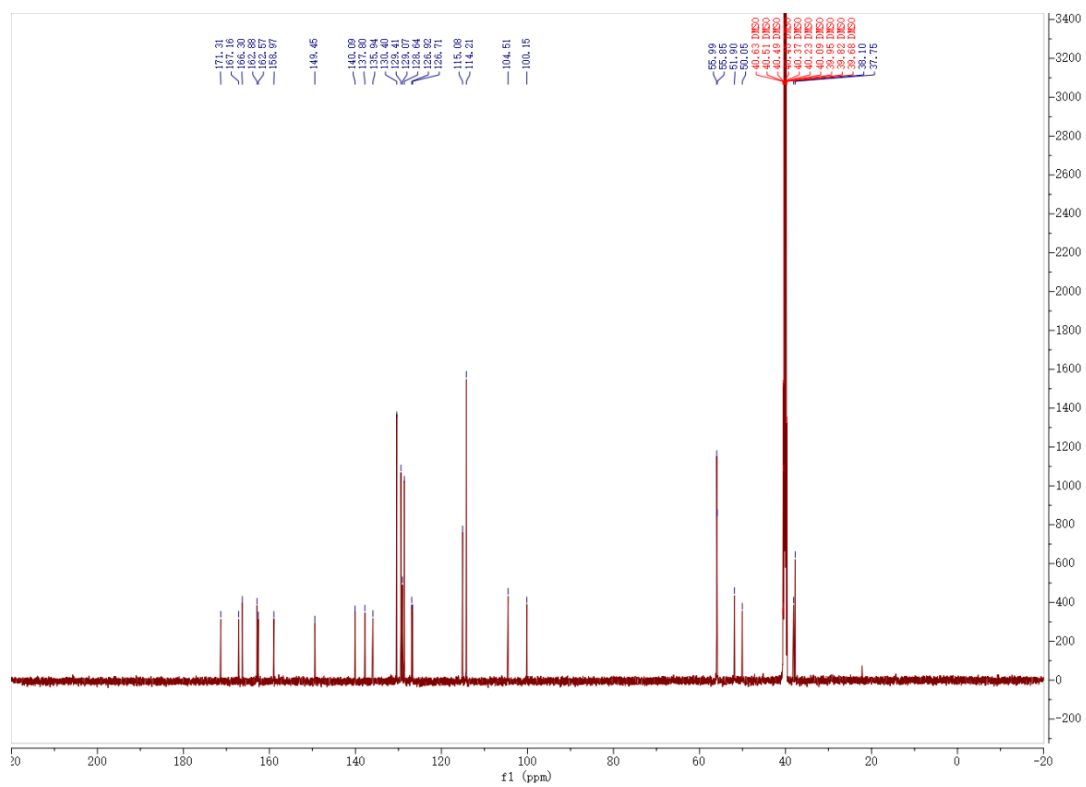

## 1.11 MS, $^1\text{H}$ -NMR and $^{13}\text{C}$ -NMR Spectra for TD-1i

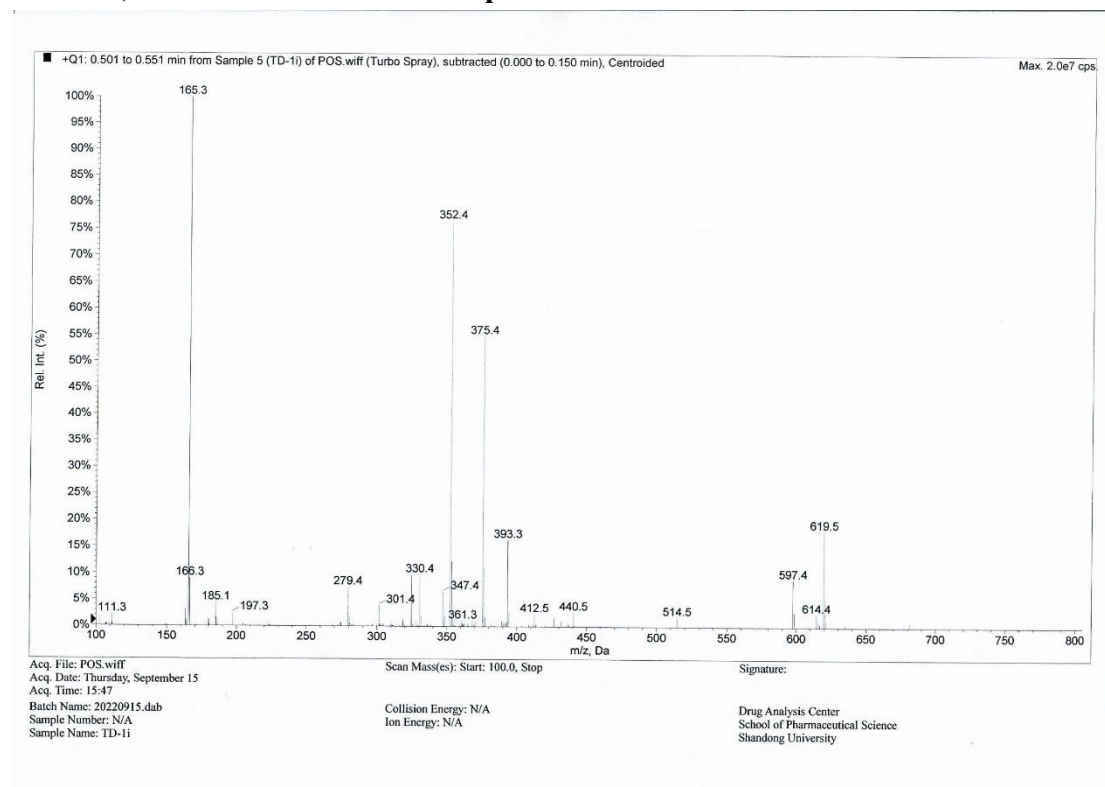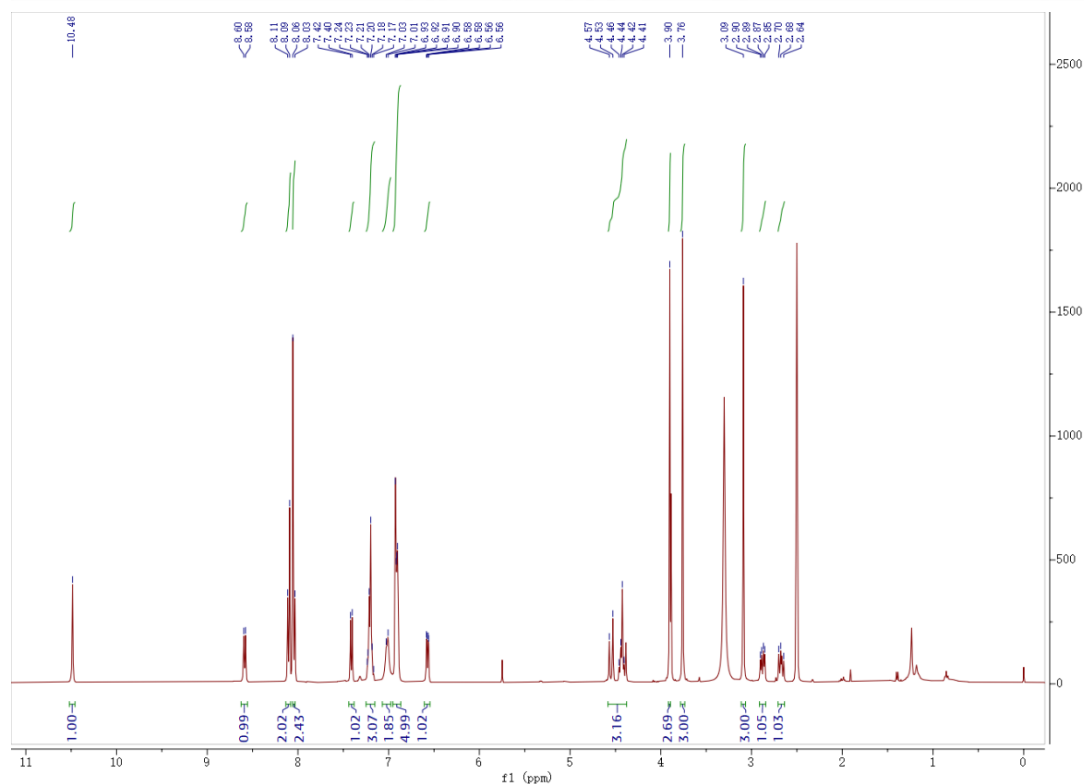

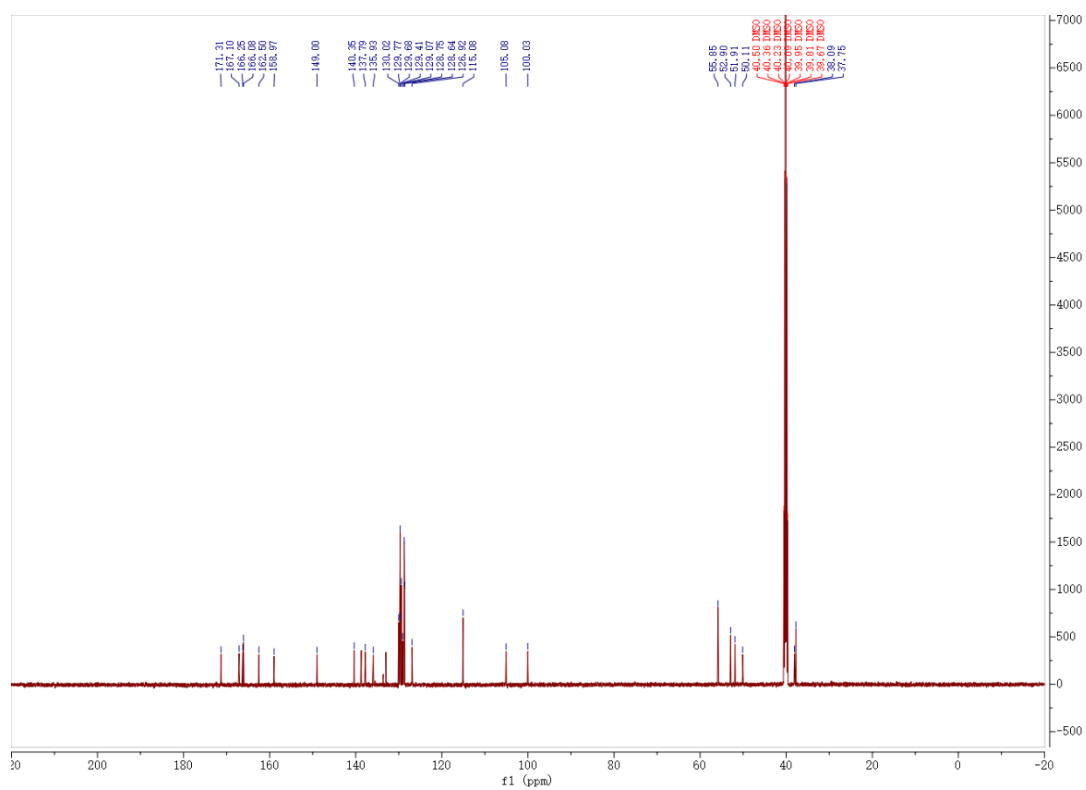

## 1.12 MS, $^1\text{H}$ -NMR and $^{13}\text{C}$ -NMR Spectra for TD-1j

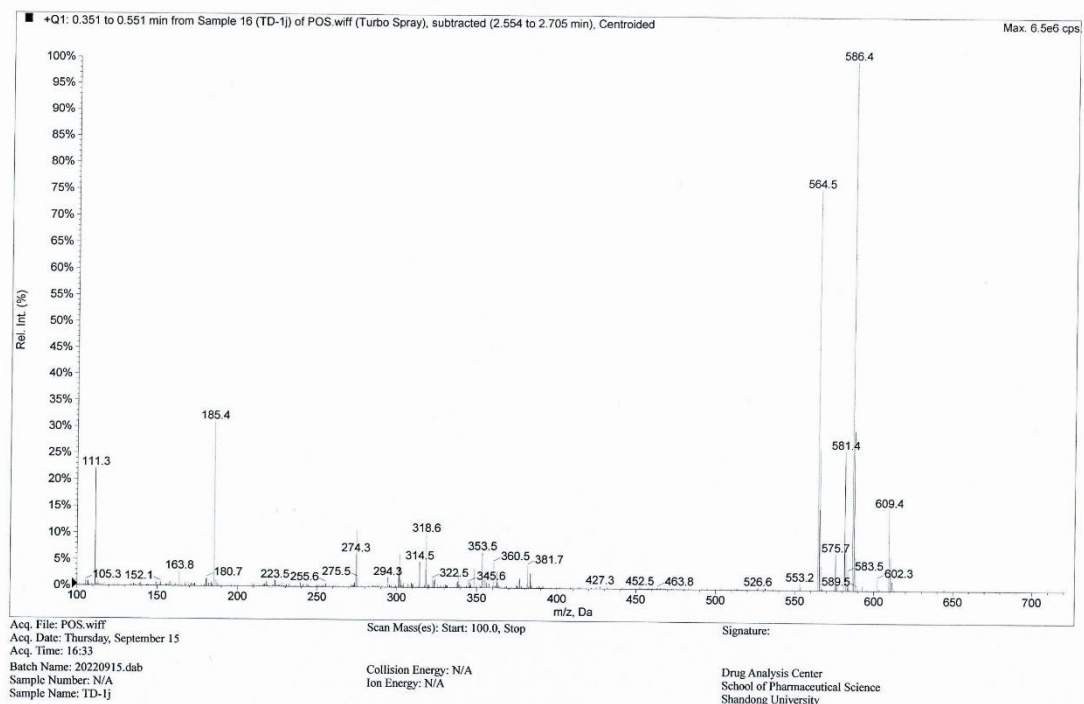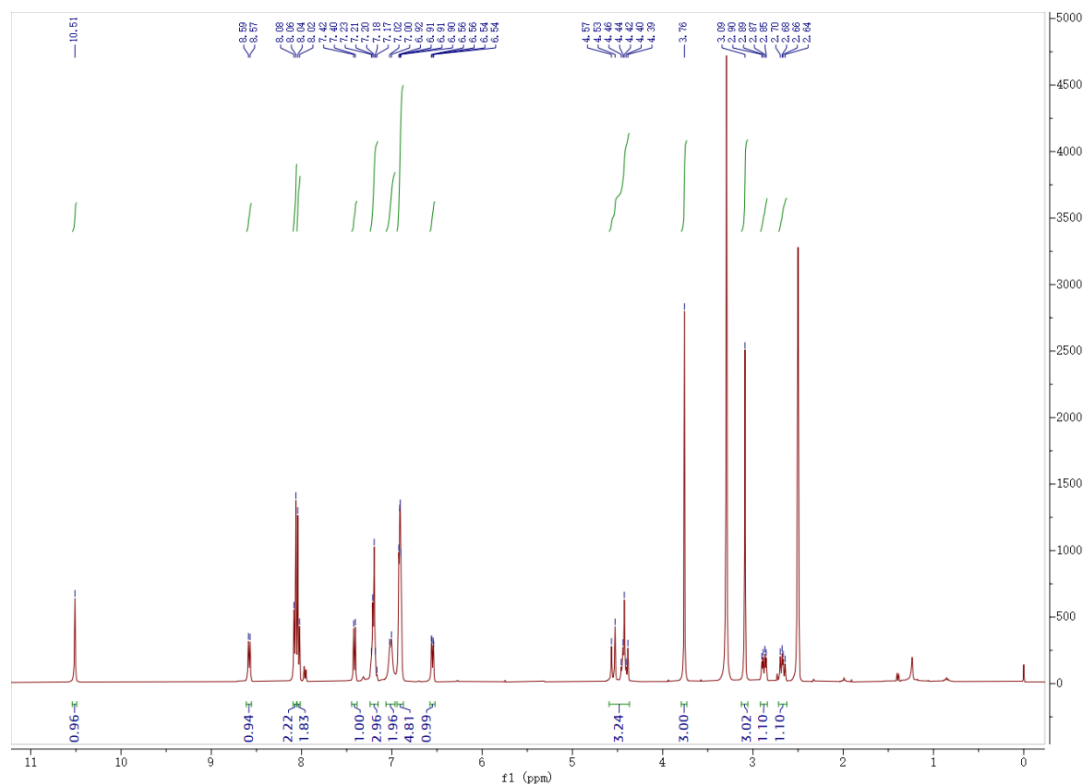



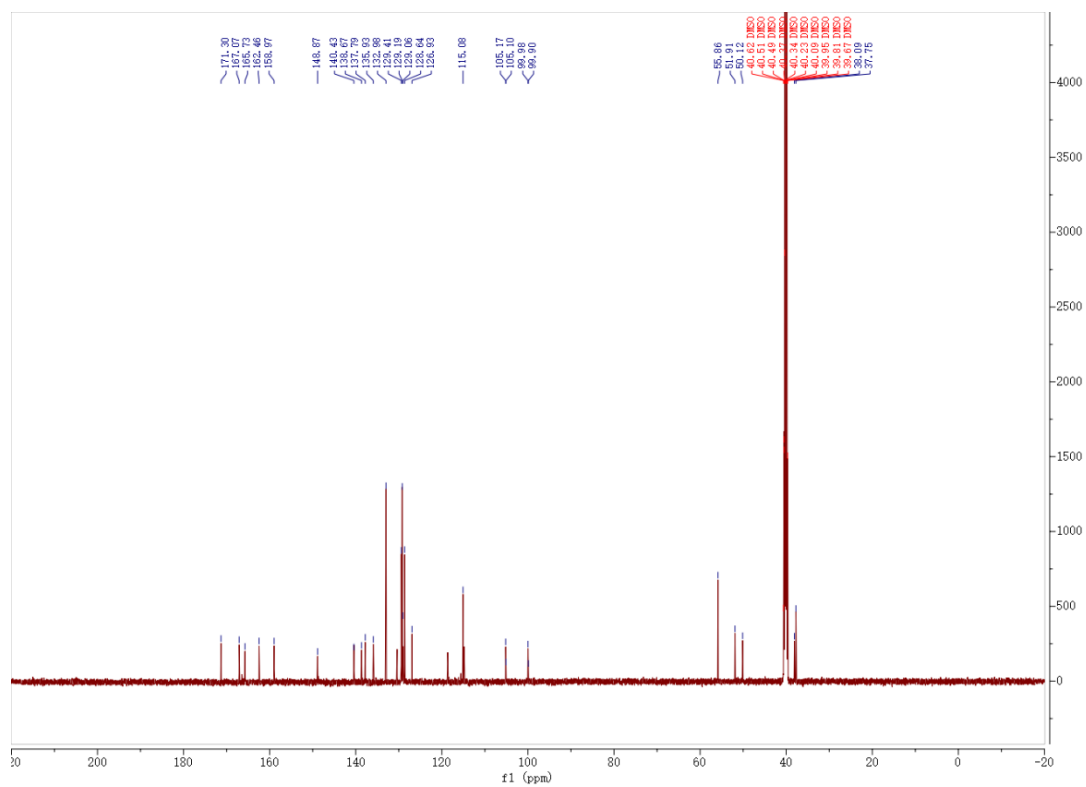

### 1.13 MS, $^1\text{H}$ -NMR and $^{13}\text{C}$ -NMR Spectra for TD-1k

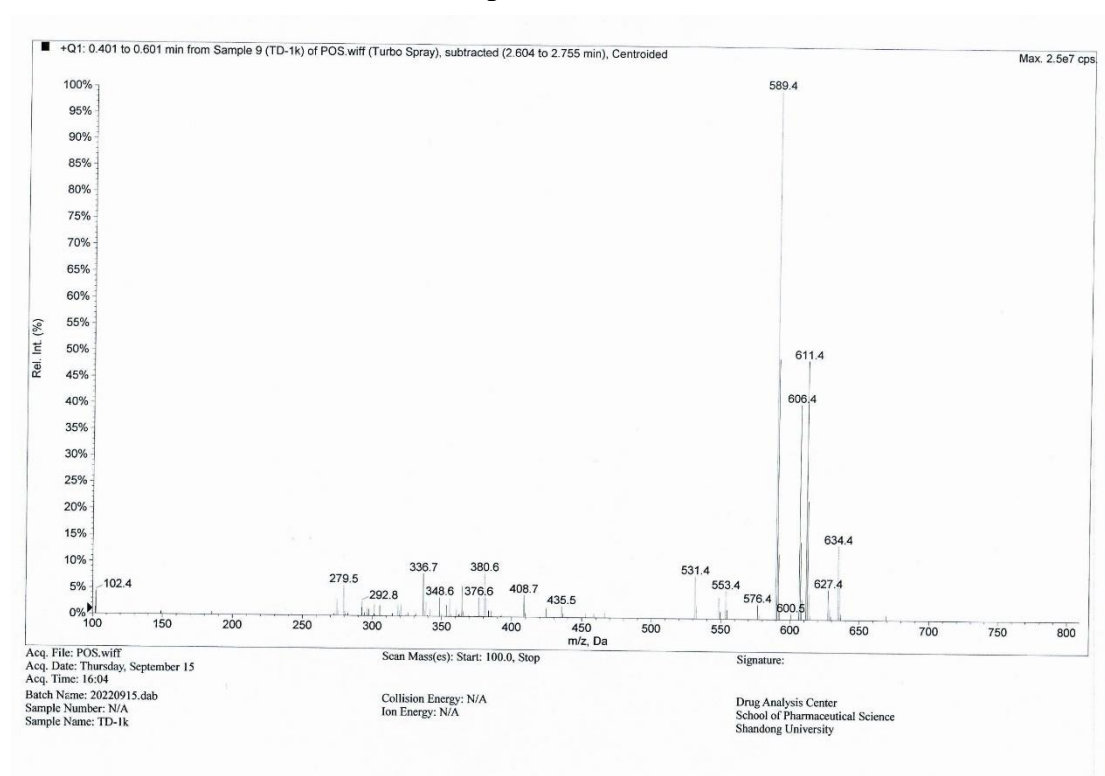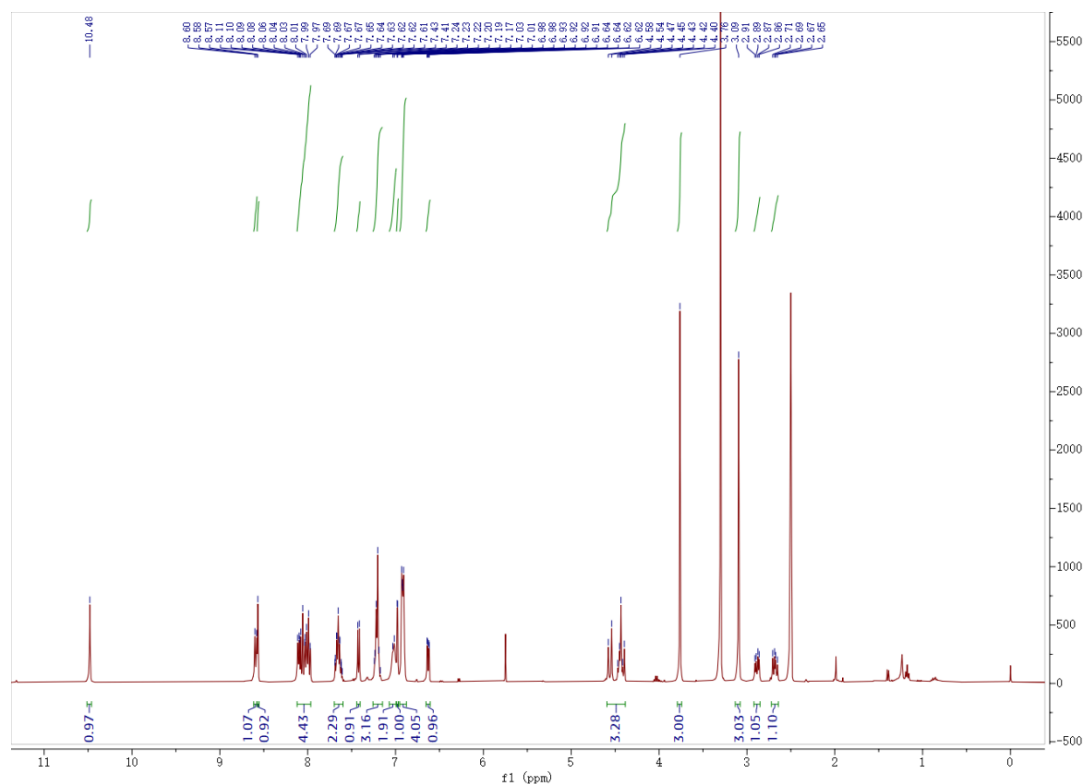

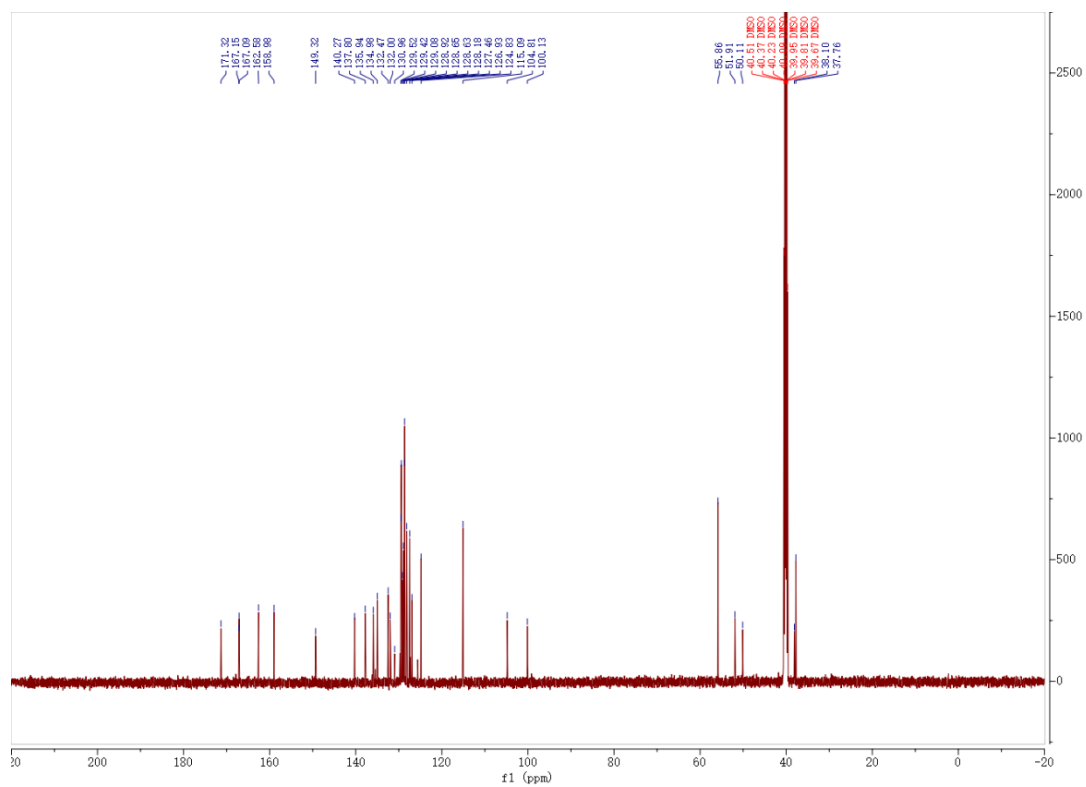

## 1.14 MS, $^1\text{H}$ -NMR and $^{13}\text{C}$ -NMR Spectra for TD-11

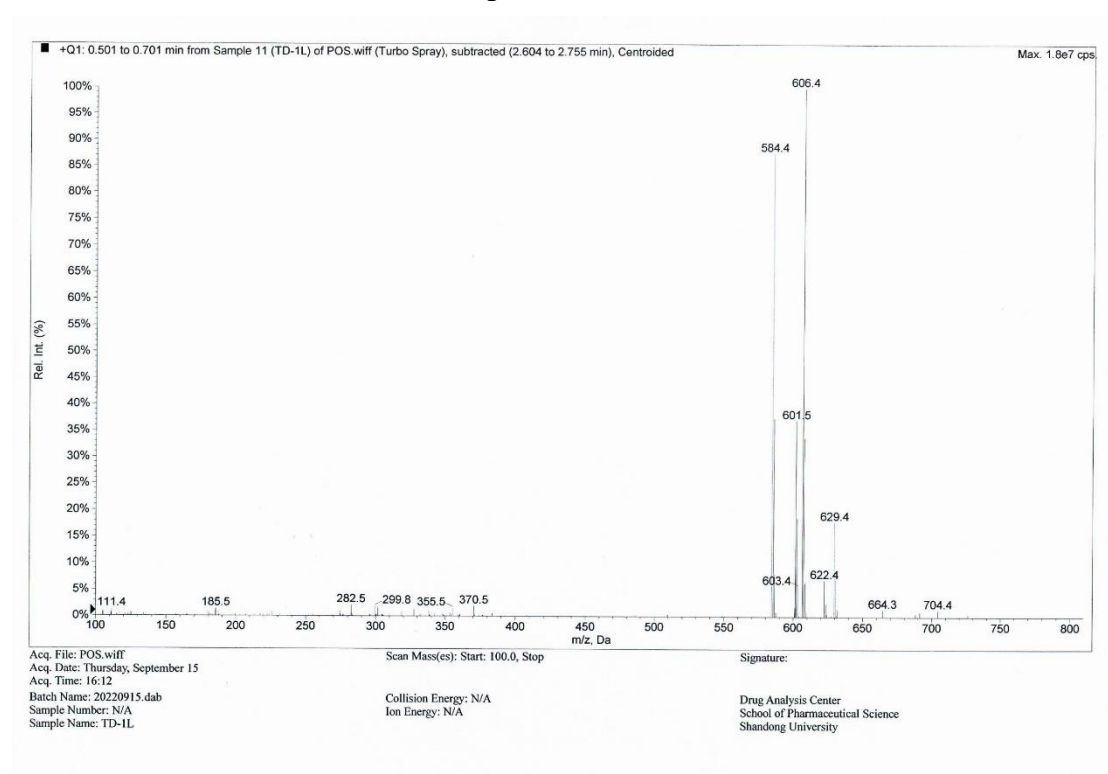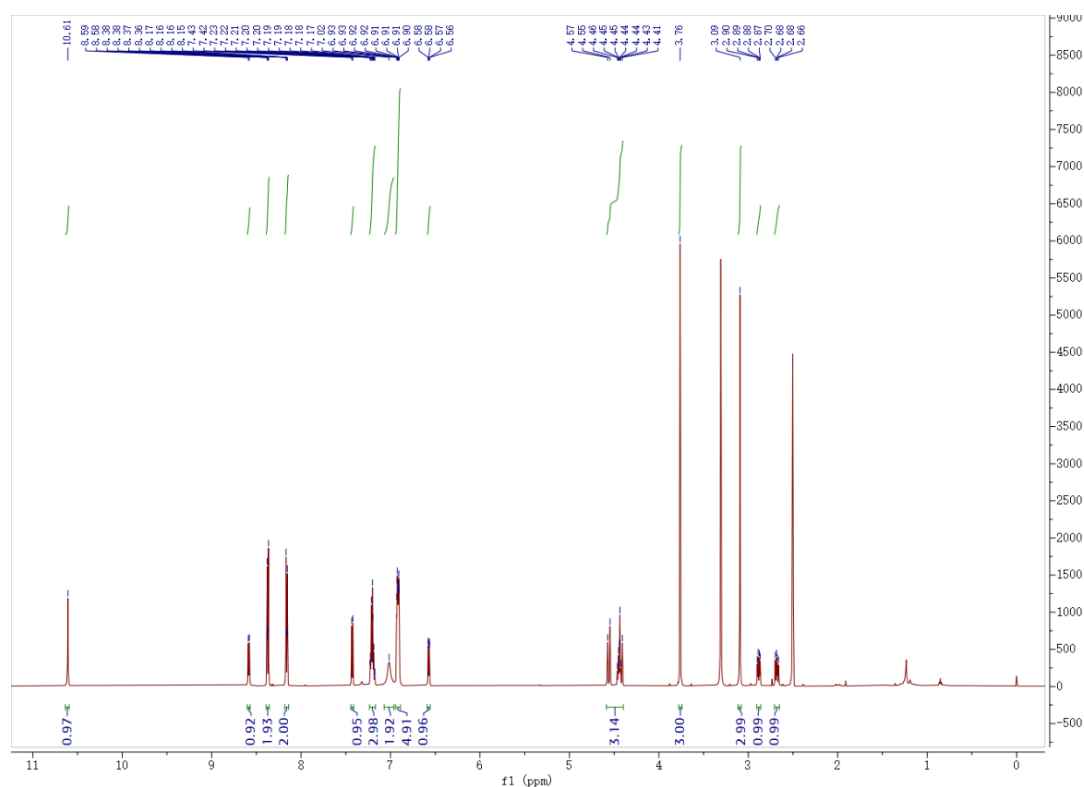

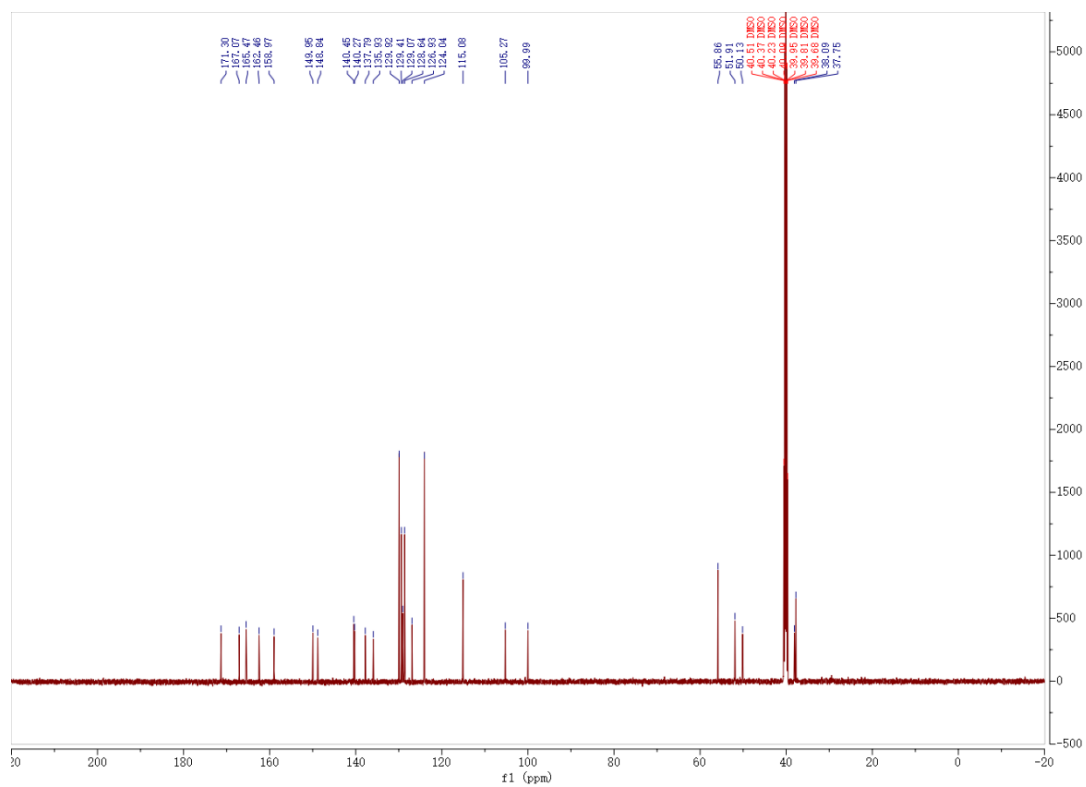

## 1.15 MS, $^1\text{H}$ -NMR and $^{13}\text{C}$ -NMR Spectra for TD-1m

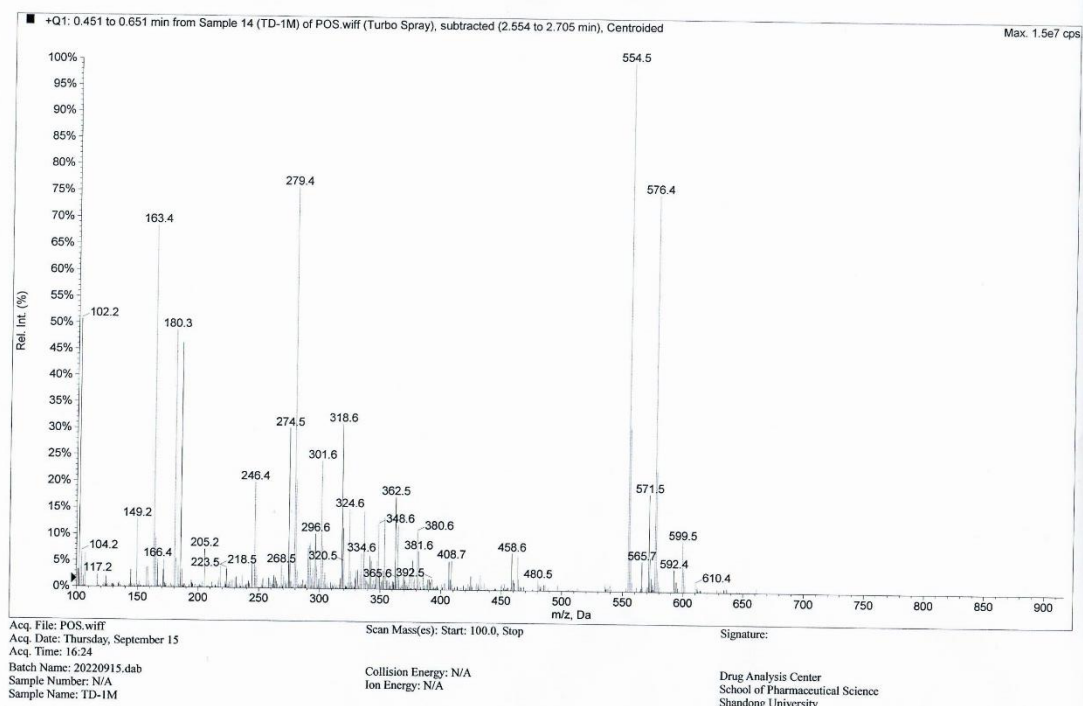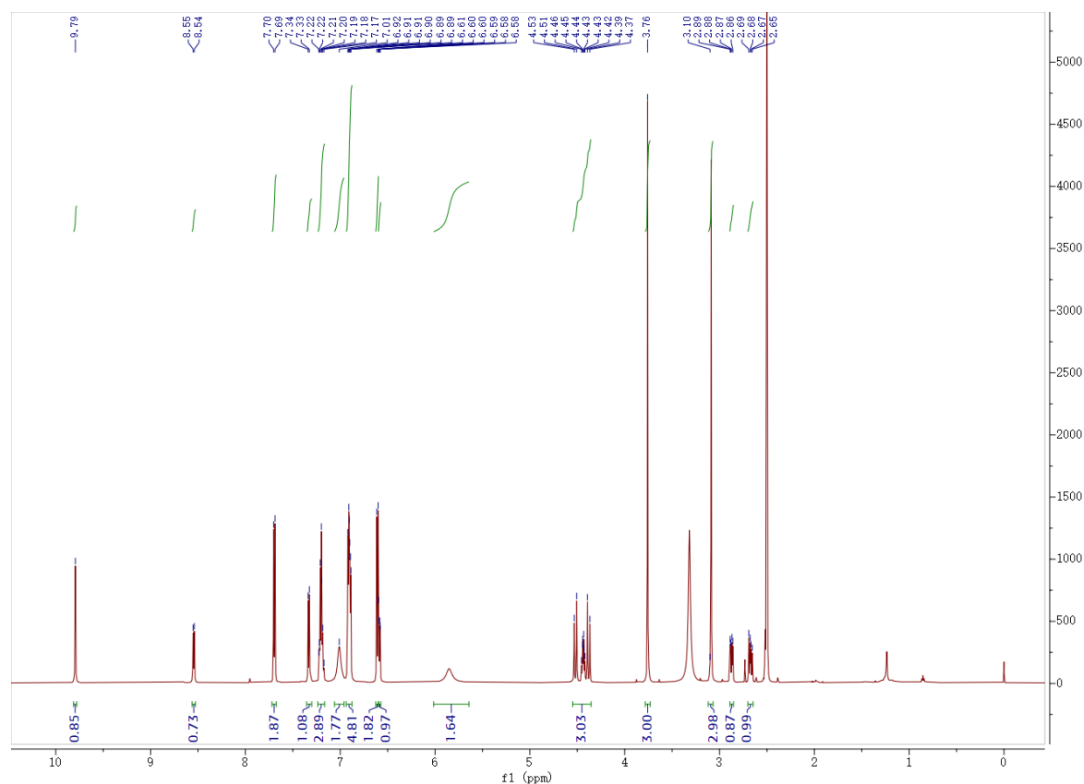

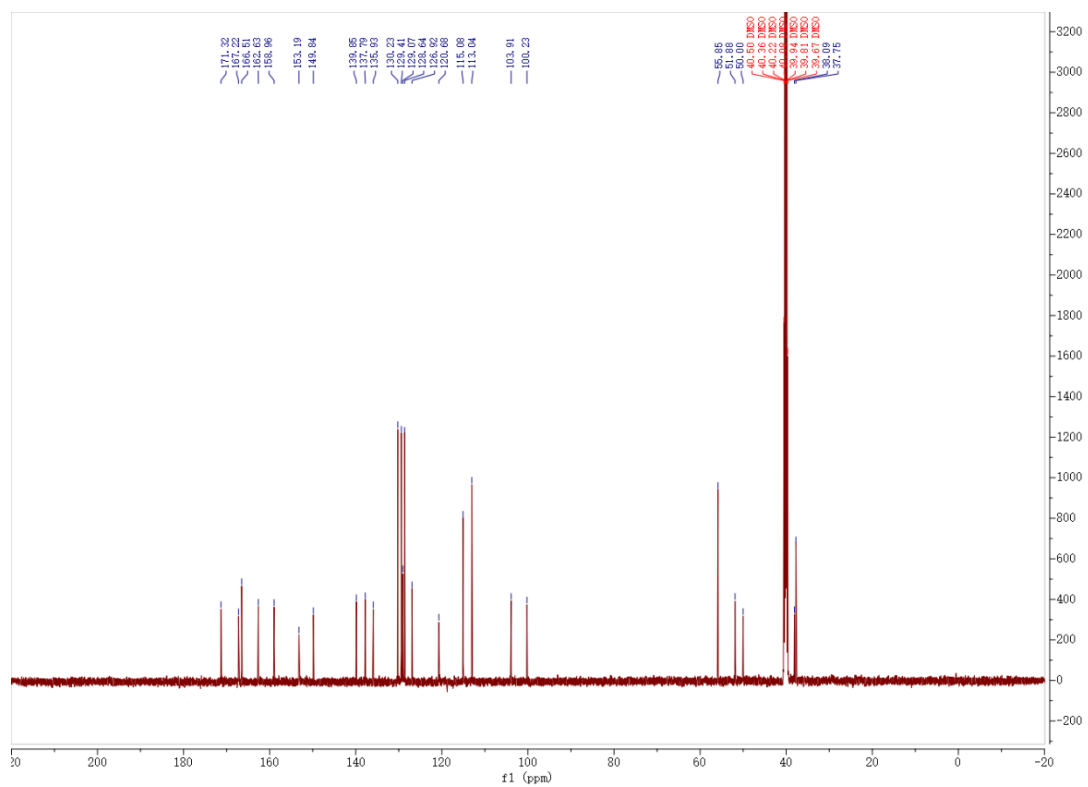

## 2 Standard Curve of Water Solubility

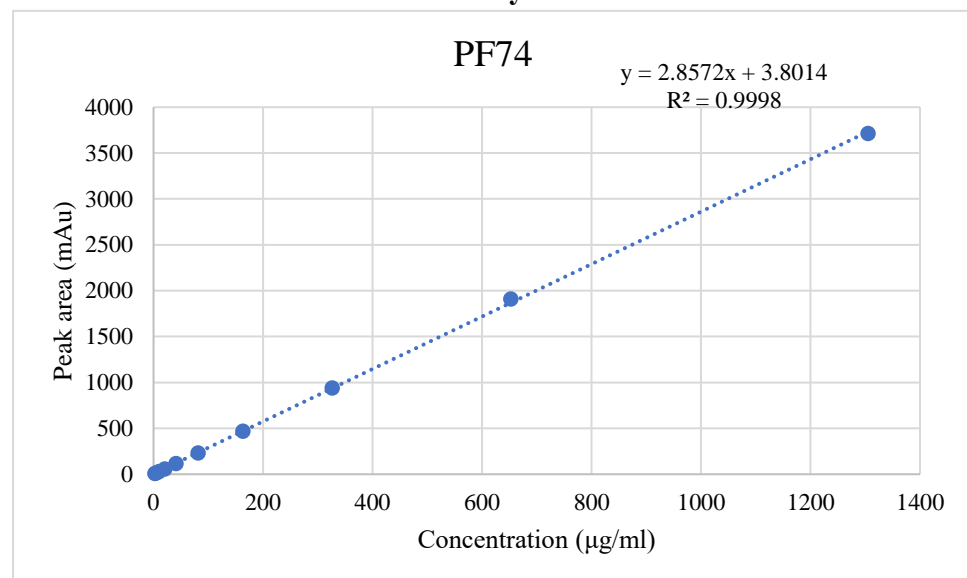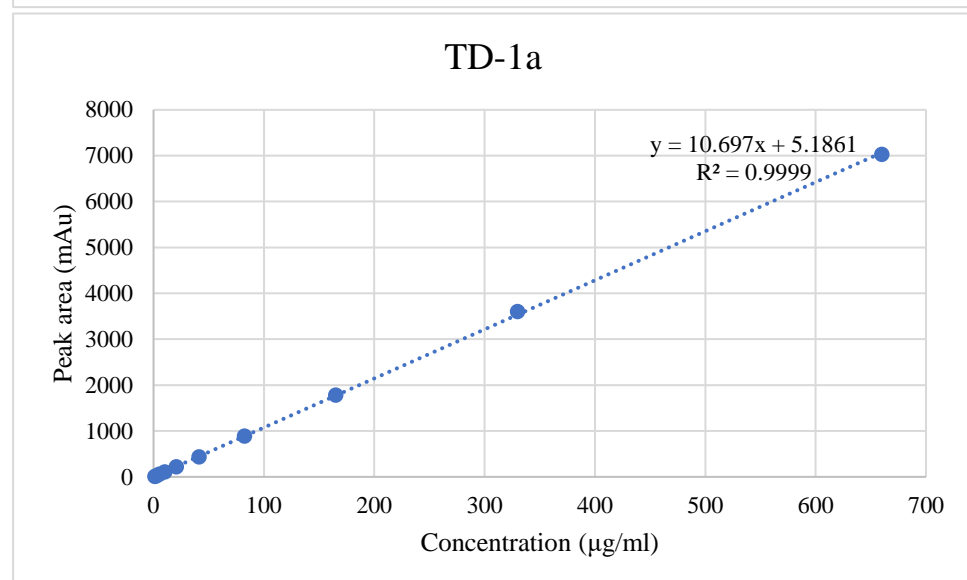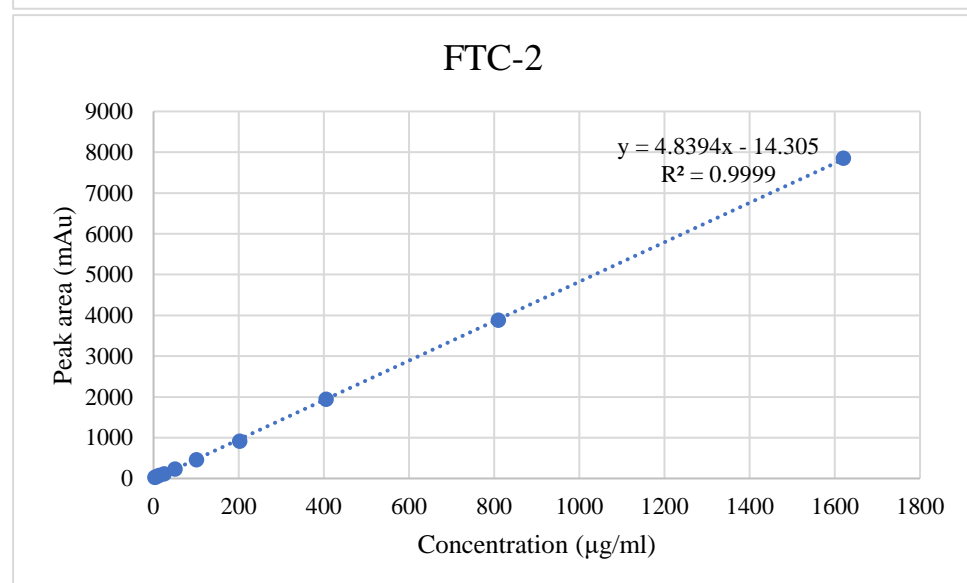

Supplement: s1 [file s1]
